# Supplementary material for: The Magnetic Behaviour of CoTPP Supported on Coinage Metal Surfaces in the Presence of Small Molecules: A Molecular Cluster Study of the Surface trans-Effect
Source: MDPI journal article supplement (doi:10.3390/nano12020218), 2022-01-10
Supplement: s1 [file s1]

## Supplementary Materials

# The Magnetic Behaviour of CoTPP Supported on Coinage Metal Surfaces in the Presence of Small Molecules: A Molecular Cluster Study of the Surface *trans*-Effect

Silvia Carlotto <sup>1,2,\*</sup>, Iulia Cojocariu <sup>3</sup>, Vitaliy Feyer <sup>3,4</sup>, Luca Floreano <sup>5</sup> and Maurizio Casarin <sup>1,2,\*</sup>

<sup>1</sup> Dipartimento di Scienze Chimiche, Università degli Studi di Padova, Via Francesco Marzolo 1, 35131 Padova, Italy

<sup>2</sup> Istituto di Chimica della Materia Condensata e di Tecnologie per l'Energia (ICMATE), Consiglio Nazionale delle Ricerche (CNR) presso Dipartimento di Scienze Chimiche, Università degli Studi di Padova, Via F. Marzolo 1, 35131 Padova, Italy

<sup>3</sup> Peter Grünberg Institute (PGI-6), Forschungszentrum Jülich GmbH, Leo-Brandt-Straße, 52428 Jülich, Germany; i.cojocariu@fz-juelich.de (I.C.); v.feyer@fz-juelich.de (V.F.)

<sup>4</sup> Fakultät f. Physik and Center for Nanointegration Duisburg-Essen (CENIDE), Universität Duisburg-Essen, D-47048 Duisburg, Germany

<sup>5</sup> Istituto Officina dei Materiali (IOM), Consiglio Nazionale delle Ricerche (CNR), Lab. TASC, S.S. 14, Km. 163,5, 34149 Trieste, Italy; floreano@iom.cnr.it

\* Correspondence: silvia.carlotto@unipd.it (S.C.); maurizio.casarin@unipd.it (M.C.)

## Supplementary Materials

**Table S1.** Optimized coordinates (Å) of the free CO ( $C_{\infty v}$ ) at the SR-ZORA, BP86, TZP, spin-restricted level of theory.

|   |          |          |          |
|---|----------|----------|----------|
| C | 0.000000 | 0.000000 | 0.000000 |
| O | 0.000000 | 0.000000 | 1.139351 |

**Table S2.** Optimized coordinates (Å) of the free NH<sub>3</sub> ( $C_{3v}$ ) at the SR-ZORA, BP86, TZP, spin-restricted level of theory.

|   |           |           |          |
|---|-----------|-----------|----------|
| N | 0.000000  | 0.000000  | 0.000000 |
| H | 0.942499  | 0.000000  | 0.401378 |
| H | -0.471250 | 0.816228  | 0.401378 |
| H | -0.471250 | -0.816228 | 0.401378 |

**Table S3.** Optimized coordinates (Å) of the free NO ( $C_{\infty v}$ ) at the SR-ZORA, BP86, TZP, spin-unrestricted level of theory.

|   |          |          |          |
|---|----------|----------|----------|
| N | 0.000000 | 0.000000 | 0.000000 |
| O | 0.000000 | 0.000000 | 1.165578 |

**Table S4.** Optimized coordinates (Å) of the free NO<sub>2</sub> ( $C_{2v}$ ) at the SR-ZORA, BP86, TZP, spin-unrestricted level of theory.

|   |           |          |           |
|---|-----------|----------|-----------|
| N | 0.000000  | 0.000000 | 0.000000  |
| O | -1.114346 | 0.000000 | -0.481995 |
| O | 1.114346  | 0.000000 | -0.481995 |

**Table S5.** Optimized coordinates (Å) of the free O<sub>2</sub> ( $D_{zh}$ ) at the SR-ZORA, BP86, TZP, spin-unrestricted level of theory.

|   |          |          |          |
|---|----------|----------|----------|
| O | 0.000000 | 0.000000 | 0.000000 |
| O | 0.000000 | 0.000000 | 1.234672 |

**Table S6.** Optimized coordinates ( $\text{\AA}$ ) of the low spin (LS) CoTPP complex ( $D_{4h}$ ) at the SR-ZORA, BP86, TZP, spin-unrestricted level of theory.

|    |           |           |           |
|----|-----------|-----------|-----------|
| Co | 0.000000  | 0.000000  | 0.000000  |
| N  | 0.000000  | 1.973938  | 0.000000  |
| N  | 0.000000  | -1.973938 | 0.000000  |
| N  | 1.973938  | 0.000000  | 0.000000  |
| N  | -1.973938 | 0.000000  | 0.000000  |
| C  | 1.099066  | 2.825358  | 0.000000  |
| C  | -1.099066 | 2.825358  | 0.000000  |
| C  | 1.099066  | -2.825358 | 0.000000  |
| C  | -1.099066 | -2.825358 | 0.000000  |
| C  | 2.825358  | 1.099066  | 0.000000  |
| C  | 2.825358  | -1.099066 | 0.000000  |
| C  | -2.825358 | 1.099066  | 0.000000  |
| C  | -2.825358 | -1.099066 | 0.000000  |
| C  | 2.435671  | 2.435671  | 0.000000  |
| C  | 2.435671  | -2.435671 | 0.000000  |
| C  | -2.435671 | 2.435671  | 0.000000  |
| C  | -2.435671 | -2.435671 | 0.000000  |
| C  | 0.680028  | 4.202653  | 0.000000  |
| C  | 0.680028  | -4.202653 | 0.000000  |
| C  | -0.680028 | 4.202653  | 0.000000  |
| C  | -0.680028 | -4.202653 | 0.000000  |
| C  | 4.202653  | 0.680028  | 0.000000  |
| C  | 4.202653  | -0.680028 | 0.000000  |
| C  | -4.202653 | 0.680028  | 0.000000  |
| C  | -4.202653 | -0.680028 | 0.000000  |
| H  | 1.354921  | 5.052148  | 0.000000  |
| H  | -1.354921 | 5.052148  | 0.000000  |
| H  | 1.354921  | -5.052148 | 0.000000  |
| H  | -1.354921 | -5.052148 | 0.000000  |
| H  | 5.052148  | 1.354921  | 0.000000  |
| H  | -5.052148 | 1.354921  | 0.000000  |
| H  | 5.052148  | -1.354921 | 0.000000  |
| H  | -5.052148 | -1.354921 | 0.000000  |
| C  | 3.495960  | 3.495960  | 0.000000  |
| C  | -3.495960 | 3.495960  | 0.000000  |
| C  | 3.495960  | -3.495960 | 0.000000  |
| C  | -3.495960 | -3.495960 | 0.000000  |
| C  | 4.001118  | 4.001118  | 1.208092  |
| C  | 4.001118  | 4.001118  | -1.208092 |
| C  | 4.001118  | -4.001118 | 1.208092  |
| C  | 4.001118  | -4.001118 | -1.208092 |
| C  | -4.001118 | 4.001118  | 1.208092  |
| C  | -4.001118 | 4.001118  | -1.208092 |
| C  | -4.001118 | -4.001118 | 1.208092  |
| C  | -4.001118 | -4.001118 | -1.208092 |
| C  | 4.989395  | 4.989395  | 1.208077  |
| C  | 4.989395  | 4.989395  | -1.208077 |
| C  | 4.989395  | -4.989395 | 1.208077  |
| C  | 4.989395  | -4.989395 | -1.208077 |
| C  | -4.989395 | 4.989395  | 1.208077  |
| C  | -4.989395 | 4.989395  | -1.208077 |

---

|   |           |           |           |
|---|-----------|-----------|-----------|
| C | -4.989395 | -4.989395 | 1.208077  |
| C | -4.989395 | -4.989395 | -1.208077 |
| C | 5.486158  | 5.486158  | 0.000000  |
| C | -5.486158 | 5.486158  | 0.000000  |
| C | 5.486158  | -5.486158 | 0.000000  |
| C | -5.486158 | -5.486158 | 0.000000  |
| H | 3.613799  | 3.613799  | 2.151717  |
| H | 3.613799  | 3.613799  | -2.151717 |
| H | 3.613799  | -3.613799 | 2.151717  |
| H | 3.613799  | -3.613799 | -2.151717 |
| H | -3.613799 | 3.613799  | 2.151717  |
| H | -3.613799 | 3.613799  | -2.151717 |
| H | -3.613799 | -3.613799 | 2.151717  |
| H | -3.613799 | -3.613799 | -2.151717 |
| H | 5.371995  | 5.371995  | 2.155576  |
| H | 5.371995  | 5.371995  | -2.155576 |
| H | 5.371995  | -5.371995 | 2.155576  |
| H | 5.371995  | -5.371995 | -2.155576 |
| H | -5.371995 | 5.371995  | 2.155576  |
| H | -5.371995 | 5.371995  | -2.155576 |
| H | -5.371995 | -5.371995 | 2.155576  |
| H | -5.371995 | -5.371995 | -2.155576 |
| H | 6.257766  | 6.257766  | 0.000000  |
| H | -6.257766 | 6.257766  | 0.000000  |
| H | 6.257766  | -6.257766 | 0.000000  |
| H | -6.257766 | -6.257766 | 0.000000  |

**Table S7.** Optimized coordinates (Å) of the LS Cu–CoTPP cluster ( $C_{4v}$ ) at the SR-ZORA, BP86, TZP, spin-restricted level of theory.

|    |           |           |           |
|----|-----------|-----------|-----------|
| Co | 0.000000  | 0.000000  | 0.180594  |
| N  | 0.000000  | 1.964519  | 0.121918  |
| N  | 0.000000  | -1.964519 | 0.121918  |
| N  | 1.964519  | 0.000000  | 0.121918  |
| N  | -1.964519 | 0.000000  | 0.121918  |
| C  | 1.098522  | 2.822002  | 0.109143  |
| C  | -1.098522 | 2.822002  | 0.109143  |
| C  | 1.098522  | -2.822002 | 0.109143  |
| C  | -1.098522 | -2.822002 | 0.109143  |
| C  | 2.822002  | 1.098522  | 0.109143  |
| C  | 2.822002  | -1.098522 | 0.109143  |
| C  | -2.822002 | 1.098522  | 0.109143  |
| C  | -2.822002 | -1.098522 | 0.109143  |
| C  | 2.434235  | 2.434235  | 0.098499  |
| C  | 2.434235  | -2.434235 | 0.098499  |
| C  | -2.434235 | 2.434235  | 0.098499  |
| C  | -2.434235 | -2.434235 | 0.098499  |
| C  | 0.679895  | 4.198913  | 0.087441  |
| C  | 0.679895  | -4.198913 | 0.087441  |
| C  | -0.679895 | 4.198913  | 0.087441  |
| C  | -0.679895 | -4.198913 | 0.087441  |
| C  | 4.198913  | 0.679895  | 0.087441  |
| C  | 4.198913  | -0.679895 | 0.087441  |
| C  | -4.198913 | 0.679895  | 0.087441  |
| C  | -4.198913 | -0.679895 | 0.087441  |
| H  | 1.355836  | 5.047286  | 0.069544  |
| H  | -1.355836 | 5.047286  | 0.069544  |
| H  | 1.355836  | -5.047286 | 0.069544  |
| H  | -1.355836 | -5.047286 | 0.069544  |
| H  | 5.047286  | 1.355836  | 0.069544  |
| H  | -5.047286 | 1.355836  | 0.069544  |
| H  | 5.047286  | -1.355836 | 0.069544  |
| H  | -5.047286 | -1.355836 | 0.069544  |
| C  | 3.493487  | 3.493487  | 0.041576  |
| C  | -3.493487 | 3.493487  | 0.041576  |
| C  | 3.493487  | -3.493487 | 0.041576  |
| C  | -3.493487 | -3.493487 | 0.041576  |
| C  | 4.035429  | 4.035429  | 1.216796  |
| C  | 3.960739  | 3.960739  | -1.196832 |
| C  | 4.035429  | -4.035429 | 1.216796  |
| C  | 3.960739  | -3.960739 | -1.196832 |
| C  | -4.035429 | 4.035429  | 1.216796  |
| C  | -3.960739 | 3.960739  | -1.196832 |
| C  | -4.035429 | -4.035429 | 1.216796  |
| C  | -3.960739 | -3.960739 | -1.196832 |
| C  | 5.022946  | 5.022946  | 1.155152  |
| C  | 4.947837  | 4.947837  | -1.258655 |
| C  | 5.022946  | -5.022946 | 1.155152  |
| C  | 4.947837  | -4.947837 | -1.258655 |
| C  | -5.022946 | 5.022946  | 1.155152  |
| C  | -4.947837 | 4.947837  | -1.258655 |

---

|    |           |           |           |
|----|-----------|-----------|-----------|
| C  | -5.022946 | -5.022946 | 1.155152  |
| C  | -4.947837 | -4.947837 | -1.258655 |
| C  | 5.481668  | 5.481668  | -0.082559 |
| C  | -5.481668 | 5.481668  | -0.082559 |
| C  | 5.481668  | -5.481668 | -0.082559 |
| C  | -5.481668 | -5.481668 | -0.082559 |
| H  | 3.677553  | 3.677553  | 2.183417  |
| H  | 3.544163  | 3.544163  | -2.115063 |
| H  | 3.677553  | -3.677553 | 2.183417  |
| H  | 3.544163  | -3.544163 | -2.115063 |
| H  | -3.677553 | 3.677553  | 2.183417  |
| H  | -3.544163 | 3.544163  | -2.115063 |
| H  | -3.677553 | -3.677553 | 2.183417  |
| H  | -3.544163 | -3.544163 | -2.115063 |
| H  | 5.434695  | 5.434695  | 2.077857  |
| H  | 5.300196  | 5.300196  | -2.229323 |
| H  | 5.434695  | -5.434695 | 2.077857  |
| H  | 5.300196  | -5.300196 | -2.229323 |
| H  | -5.434695 | 5.434695  | 2.077857  |
| H  | -5.300196 | 5.300196  | -2.229323 |
| H  | -5.434695 | -5.434695 | 2.077857  |
| H  | -5.300196 | -5.300196 | -2.229323 |
| H  | 6.252493  | 6.252493  | -0.130778 |
| H  | -6.252493 | 6.252493  | -0.130778 |
| H  | 6.252493  | -6.252493 | -0.130778 |
| H  | -6.252493 | -6.252493 | -0.130778 |
| Cu | 0.000000  | 0.000000  | 2.447107  |

**Table S8.** Optimized coordinates (Å) of the LS Ag–CoTPP cluster ( $C_{4v}$ ) at the SR-ZORA, BP86, TZP, spin-restricted level of theory.

|    |           |           |           |
|----|-----------|-----------|-----------|
| Co | 0.000000  | 0.000000  | 0.002320  |
| N  | 0.000000  | 1.964534  | -0.047400 |
| N  | 0.000000  | -1.964534 | -0.047400 |
| N  | 1.964534  | 0.000000  | -0.047400 |
| N  | -1.964534 | 0.000000  | -0.047400 |
| C  | 1.098492  | 2.822267  | -0.044703 |
| C  | -1.098492 | 2.822267  | -0.044703 |
| C  | 1.098492  | -2.822267 | -0.044703 |
| C  | -1.098492 | -2.822267 | -0.044703 |
| C  | 2.822267  | 1.098492  | -0.044703 |
| C  | 2.822267  | -1.098492 | -0.044703 |
| C  | -2.822267 | 1.098492  | -0.044703 |
| C  | -2.822267 | -1.098492 | -0.044703 |
| C  | 2.434004  | 2.434004  | -0.035185 |
| C  | 2.434004  | -2.434004 | -0.035185 |
| C  | -2.434004 | 2.434004  | -0.035185 |
| C  | -2.434004 | -2.434004 | -0.035185 |
| C  | 0.680071  | 4.199328  | -0.053687 |
| C  | 0.680071  | -4.199328 | -0.053687 |
| C  | -0.680071 | 4.199328  | -0.053687 |
| C  | -0.680071 | -4.199328 | -0.053687 |
| C  | 4.199328  | 0.680071  | -0.053687 |
| C  | 4.199328  | -0.680071 | -0.053687 |
| C  | -4.199328 | 0.680071  | -0.053687 |
| C  | -4.199328 | -0.680071 | -0.053687 |
| H  | 1.356244  | 5.047614  | -0.063645 |
| H  | -1.356244 | 5.047614  | -0.063645 |
| H  | 1.356244  | -5.047614 | -0.063645 |
| H  | -1.356244 | -5.047614 | -0.063645 |
| H  | 5.047614  | 1.356244  | -0.063645 |
| H  | -5.047614 | 1.356244  | -0.063645 |
| H  | 5.047614  | -1.356244 | -0.063645 |
| H  | -5.047614 | -1.356244 | -0.063645 |
| C  | 3.493510  | 3.493510  | 0.005797  |
| C  | -3.493510 | 3.493510  | 0.005797  |
| C  | 3.493510  | -3.493510 | 0.005797  |
| C  | -3.493510 | -3.493510 | 0.005797  |
| C  | 3.970259  | 3.970259  | 1.236953  |
| C  | 4.026568  | 4.026568  | -1.177521 |
| C  | 3.970259  | -3.970259 | 1.236953  |
| C  | 4.026568  | -4.026568 | -1.177521 |
| C  | -3.970259 | 3.970259  | 1.236953  |
| C  | -4.026568 | 4.026568  | -1.177521 |
| C  | -3.970259 | -3.970259 | 1.236953  |
| C  | -4.026568 | -4.026568 | -1.177521 |
| C  | 4.957777  | 4.957777  | 1.284560  |
| C  | 5.014375  | 5.014375  | -1.130628 |
| C  | 4.957777  | -4.957777 | 1.284560  |
| C  | 5.014375  | -5.014375 | -1.130628 |
| C  | -4.957777 | 4.957777  | 1.284560  |
| C  | -5.014375 | 5.014375  | -1.130628 |

---

|    |           |           |           |
|----|-----------|-----------|-----------|
| C  | -4.957777 | -4.957777 | 1.284560  |
| C  | -5.014375 | -5.014375 | -1.130628 |
| C  | 5.482483  | 5.482483  | 0.100193  |
| C  | -5.482483 | 5.482483  | 0.100193  |
| C  | 5.482483  | -5.482483 | 0.100193  |
| C  | -5.482483 | -5.482483 | 0.100193  |
| H  | 3.560751  | 3.560751  | 2.161570  |
| H  | 3.661322  | 3.661322  | -2.138468 |
| H  | 3.560751  | -3.560751 | 2.161570  |
| H  | 3.661322  | -3.661322 | -2.138468 |
| H  | -3.560751 | 3.560751  | 2.161570  |
| H  | -3.661322 | 3.661322  | -2.138468 |
| H  | -3.560751 | -3.560751 | 2.161570  |
| H  | -3.661322 | -3.661322 | -2.138468 |
| H  | 5.317665  | 5.317665  | 2.249904  |
| H  | 5.419117  | 5.419117  | -2.059654 |
| H  | 5.317665  | -5.317665 | 2.249904  |
| H  | 5.419117  | -5.419117 | -2.059654 |
| H  | -5.317665 | 5.317665  | 2.249904  |
| H  | -5.419117 | 5.419117  | -2.059654 |
| H  | -5.317665 | -5.317665 | 2.249904  |
| H  | -5.419117 | -5.419117 | -2.059654 |
| H  | 6.253457  | 6.253457  | 0.136222  |
| H  | -6.253457 | 6.253457  | 0.136222  |
| H  | 6.253457  | -6.253457 | 0.136222  |
| H  | -6.253457 | -6.253457 | 0.136222  |
| Ag | 0.000000  | 0.000000  | 2.475936  |

**Table S9.** Optimized coordinates (Å) of the LS Au–CoTPP cluster ( $C_{4v}$ ) at the SR-ZORA, BP86, TZP, spin-restricted level of theory.

|    |           |           |           |
|----|-----------|-----------|-----------|
| Co | 0.000000  | 0.000000  | 0.243247  |
| N  | 0.000000  | 1.966163  | 0.145724  |
| N  | 0.000000  | -1.966163 | 0.145724  |
| N  | 1.966163  | 0.000000  | 0.145724  |
| N  | -1.966163 | 0.000000  | 0.145724  |
| C  | 1.098162  | 2.821823  | 0.135009  |
| C  | -1.098162 | 2.821823  | 0.135009  |
| C  | 1.098162  | -2.821823 | 0.135009  |
| C  | -1.098162 | -2.821823 | 0.135009  |
| C  | 2.821823  | 1.098162  | 0.135009  |
| C  | 2.821823  | -1.098162 | 0.135009  |
| C  | -2.821823 | 1.098162  | 0.135009  |
| C  | -2.821823 | -1.098162 | 0.135009  |
| C  | 2.433913  | 2.433913  | 0.126528  |
| C  | 2.433913  | -2.433913 | 0.126528  |
| C  | -2.433913 | 2.433913  | 0.126528  |
| C  | -2.433913 | -2.433913 | 0.126528  |
| C  | 0.679802  | 4.198671  | 0.110959  |
| C  | 0.679802  | -4.198671 | 0.110959  |
| C  | -0.679802 | 4.198671  | 0.110959  |
| C  | -0.679802 | -4.198671 | 0.110959  |
| C  | 4.198671  | 0.679802  | 0.110959  |
| C  | 4.198671  | -0.679802 | 0.110959  |
| C  | -4.198671 | 0.679802  | 0.110959  |
| C  | -4.198671 | -0.679802 | 0.110959  |
| H  | 1.356244  | 5.046495  | 0.092331  |
| H  | -1.356244 | 5.046495  | 0.092331  |
| H  | 1.356244  | -5.046495 | 0.092331  |
| H  | -1.356244 | -5.046495 | 0.092331  |
| H  | 5.046495  | 1.356244  | 0.092331  |
| H  | -5.046495 | 1.356244  | 0.092331  |
| H  | 5.046495  | -1.356244 | 0.092331  |
| H  | -5.046495 | -1.356244 | 0.092331  |
| C  | 3.493386  | 3.493386  | 0.076474  |
| C  | -3.493386 | 3.493386  | 0.076474  |
| C  | 3.493386  | -3.493386 | 0.076474  |
| C  | -3.493386 | -3.493386 | 0.076474  |
| C  | 4.030925  | 4.030925  | 1.255736  |
| C  | 3.964328  | 3.964328  | -1.159238 |
| C  | 4.030925  | -4.030925 | 1.255736  |
| C  | 3.964328  | -3.964328 | -1.159238 |
| C  | -4.030925 | 4.030925  | 1.255736  |
| C  | -3.964328 | 3.964328  | -1.159238 |
| C  | -4.030925 | -4.030925 | 1.255736  |
| C  | -3.964328 | -3.964328 | -1.159238 |
| C  | 5.018667  | 5.018667  | 1.199918  |
| C  | 4.951624  | 4.951624  | -1.215358 |
| C  | 5.018667  | -5.018667 | 1.199918  |
| C  | 4.951624  | -4.951624 | -1.215358 |
| C  | -5.018667 | 5.018667  | 1.199918  |
| C  | -4.951624 | 4.951624  | -1.215358 |



---

|    |           |           |           |
|----|-----------|-----------|-----------|
| C  | -5.018667 | -5.018667 | 1.199918  |
| C  | -4.951624 | -4.951624 | -1.215358 |
| C  | 5.481671  | 5.481671  | -0.034906 |
| C  | -5.481671 | 5.481671  | -0.034906 |
| C  | 5.481671  | -5.481671 | -0.034906 |
| C  | -5.481671 | -5.481671 | -0.034906 |
| H  | 3.669964  | 3.669964  | 2.219898  |
| H  | 3.550810  | 3.550810  | -2.080223 |
| H  | 3.669964  | -3.669964 | 2.219898  |
| H  | 3.550810  | -3.550810 | -2.080223 |
| H  | -3.669964 | 3.669964  | 2.219898  |
| H  | -3.550810 | 3.550810  | -2.080223 |
| H  | -3.669964 | -3.669964 | 2.219898  |
| H  | -3.550810 | -3.550810 | -2.080223 |
| H  | 5.427247  | 5.427247  | 2.125554  |
| H  | 5.306988  | 5.306988  | -2.184010 |
| H  | 5.427247  | -5.427247 | 2.125554  |
| H  | 5.306988  | -5.306988 | -2.184010 |
| H  | -5.427247 | 5.427247  | 2.125554  |
| H  | -5.306988 | 5.306988  | -2.184010 |
| H  | -5.427247 | -5.427247 | 2.125554  |
| H  | -5.306988 | -5.306988 | -2.184010 |
| H  | 6.252528  | 6.252528  | -0.077784 |
| H  | -6.252528 | 6.252528  | -0.077784 |
| H  | 6.252528  | -6.252528 | -0.077784 |
| H  | -6.252528 | -6.252528 | -0.077784 |
| Au | 0.000000  | 0.000000  | 2.701329  |

**Table S10.** Optimized coordinates (Å) of the LS CoTPP-CO adduct (C<sub>4v</sub>) at the SR-ZORA, BP86, TZP, spin-unrestricted level of theory.

|    |           |           |           |
|----|-----------|-----------|-----------|
| Co | 0.000000  | 0.000000  | -0.247685 |
| N  | 0.000000  | 1.987955  | -0.002655 |
| N  | 0.000000  | -1.987955 | -0.002655 |
| N  | 1.987955  | 0.000000  | -0.002655 |
| N  | -1.987955 | 0.000000  | -0.002655 |
| C  | 1.099155  | 2.831102  | 0.022452  |
| C  | -1.099155 | 2.831102  | 0.022452  |
| C  | 1.099155  | -2.831102 | 0.022452  |
| C  | -1.099155 | -2.831102 | 0.022452  |
| C  | 2.831102  | 1.099155  | 0.022452  |
| C  | 2.831102  | -1.099155 | 0.022452  |
| C  | -2.831102 | 1.099155  | 0.022452  |
| C  | -2.831102 | -1.099155 | 0.022452  |
| C  | 2.437014  | 2.437014  | 0.013469  |
| C  | 2.437014  | -2.437014 | 0.013469  |
| C  | -2.437014 | 2.437014  | 0.013469  |
| C  | -2.437014 | -2.437014 | 0.013469  |
| C  | 0.680419  | 4.209418  | 0.075340  |
| C  | 0.680419  | -4.209418 | 0.075340  |
| C  | -0.680419 | 4.209418  | 0.075340  |
| C  | -0.680419 | -4.209418 | 0.075340  |
| C  | 4.209418  | 0.680419  | 0.075340  |
| C  | 4.209418  | -0.680419 | 0.075340  |
| C  | -4.209418 | 0.680419  | 0.075340  |
| C  | -4.209418 | -0.680419 | 0.075340  |
| H  | 1.355816  | 5.057602  | 0.116089  |
| H  | -1.355816 | 5.057602  | 0.116089  |
| H  | 1.355816  | -5.057602 | 0.116089  |
| H  | -1.355816 | -5.057602 | 0.116089  |
| H  | 5.057602  | 1.355816  | 0.116089  |
| H  | -5.057602 | 1.355816  | 0.116089  |
| H  | 5.057602  | -1.355816 | 0.116089  |
| H  | -5.057602 | -1.355816 | 0.116089  |
| C  | 3.496933  | 3.496933  | 0.008338  |
| C  | -3.496933 | 3.496933  | 0.008338  |
| C  | 3.496933  | -3.496933 | 0.008338  |
| C  | -3.496933 | -3.496933 | 0.008338  |
| C  | 4.008409  | 4.008409  | 1.210807  |
| C  | 3.994644  | 3.994644  | -1.205922 |
| C  | 4.008409  | -4.008409 | 1.210807  |
| C  | 3.994644  | -3.994644 | -1.205922 |
| C  | -4.008409 | 4.008409  | 1.210807  |
| C  | -3.994644 | 3.994644  | -1.205922 |
| C  | -4.008409 | -4.008409 | 1.210807  |
| C  | -3.994644 | -3.994644 | -1.205922 |
| C  | 4.996636  | 4.996636  | 1.199116  |
| C  | 4.982777  | 4.982777  | -1.217624 |
| C  | 4.996636  | -4.996636 | 1.199116  |
| C  | 4.982777  | -4.982777 | -1.217624 |
| C  | -4.996636 | 4.996636  | 1.199116  |
| C  | -4.982777 | 4.982777  | -1.217624 |

---

|   |           |           |           |
|---|-----------|-----------|-----------|
| C | -4.996636 | -4.996636 | 1.199116  |
| C | -4.982777 | -4.982777 | -1.217624 |
| C | 5.486237  | 5.486237  | -0.014999 |
| C | -5.486237 | 5.486237  | -0.014999 |
| C | 5.486237  | -5.486237 | -0.014999 |
| C | -5.486237 | -5.486237 | -0.014999 |
| H | 3.626068  | 3.626068  | 2.158607  |
| H | 3.601610  | 3.601610  | -2.144785 |
| H | 3.626068  | -3.626068 | 2.158607  |
| H | 3.601610  | -3.601610 | -2.144785 |
| H | -3.626068 | 3.626068  | 2.158607  |
| H | -3.601610 | 3.601610  | -2.144785 |
| H | -3.626068 | -3.626068 | 2.158607  |
| H | -3.601610 | -3.601610 | -2.144785 |
| H | 5.384669  | 5.384669  | 2.142154  |
| H | 5.359718  | 5.359718  | -2.169659 |
| H | 5.384669  | -5.384669 | 2.142154  |
| H | 5.359718  | -5.359718 | -2.169659 |
| H | -5.384669 | 5.384669  | 2.142154  |
| H | -5.359718 | 5.359718  | -2.169659 |
| H | -5.384669 | -5.384669 | 2.142154  |
| H | -5.359718 | -5.359718 | -2.169659 |
| H | 6.257750  | 6.257750  | -0.023904 |
| H | -6.257750 | 6.257750  | -0.023904 |
| H | 6.257750  | -6.257750 | -0.023904 |
| H | -6.257750 | -6.257750 | -0.023904 |
| C | 0.000000  | 0.000000  | -2.106731 |
| O | 0.000000  | 0.000000  | -3.263621 |

**Table S11.** Optimized coordinates (Å) of the LS CoTPP-NH<sub>3</sub> adduct (C<sub>s</sub>) at the SR-ZORA, BP86, TZP, spin-unrestricted level of theory.

|    |           |           |           |
|----|-----------|-----------|-----------|
| Co | -0.178880 | 0.003912  | 0.000000  |
| N  | -0.081012 | 0.001503  | 1.982543  |
| N  | -0.063172 | 1.983512  | 0.000000  |
| N  | -0.084230 | -1.980362 | 0.000000  |
| N  | -0.081012 | 0.001503  | -1.982543 |
| C  | 0.112428  | -5.495618 | 5.477516  |
| C  | 1.287776  | -5.023271 | 4.886077  |
| C  | 1.230076  | -4.033086 | 3.901757  |
| C  | -0.002555 | -3.498068 | 3.494832  |
| C  | -1.176288 | -3.978502 | 4.095734  |
| C  | -1.120098 | -4.970566 | 5.079120  |
| C  | -0.054547 | -2.436344 | 2.437099  |
| C  | -0.053499 | -1.098360 | 2.831295  |
| C  | -0.049933 | 1.100472  | 2.831523  |
| C  | -0.007854 | 0.681444  | 4.210605  |
| C  | -0.008247 | -0.679362 | 4.210364  |
| C  | -0.035001 | 2.438184  | 2.437398  |
| C  | 0.000606  | 3.497743  | 3.497480  |
| C  | 1.224142  | 4.018964  | 3.947195  |
| C  | 1.258057  | 5.007687  | 4.934019  |
| C  | 0.068471  | 5.490336  | 5.486453  |
| C  | -1.155117 | 4.978966  | 5.044988  |
| C  | -1.187850 | 3.989081  | 4.058881  |
| C  | -0.027913 | 2.832074  | -1.099525 |
| C  | 0.026504  | 4.210480  | -0.680453 |
| C  | 0.026504  | 4.210480  | 0.680453  |
| C  | -0.027913 | 2.832074  | 1.099525  |
| C  | -0.035001 | 2.438184  | -2.437398 |
| C  | 0.000606  | 3.497743  | -3.497480 |
| C  | 1.224142  | 4.018964  | -3.947195 |
| C  | 1.258057  | 5.007687  | -4.934019 |
| C  | 0.068471  | 5.490336  | -5.486453 |
| C  | -1.155117 | 4.978966  | -5.044988 |
| C  | -1.187850 | 3.989081  | -4.058881 |
| C  | -0.067052 | -2.829695 | -1.098968 |
| C  | -0.051275 | -4.209564 | -0.680261 |
| C  | -0.051275 | -4.209564 | 0.680261  |
| C  | -0.067052 | -2.829695 | 1.098968  |
| C  | -0.054547 | -2.436344 | -2.437099 |
| C  | -0.002555 | -3.498068 | -3.494832 |
| C  | 1.230076  | -4.033086 | -3.901757 |
| C  | 1.287776  | -5.023271 | -4.886077 |
| C  | 0.112428  | -5.495618 | -5.477516 |
| C  | -1.120098 | -4.970566 | -5.079120 |
| C  | -1.176288 | -3.978502 | -4.095734 |
| C  | -0.049933 | 1.100472  | -2.831523 |
| C  | -0.007854 | 0.681444  | -4.210605 |
| C  | -0.008247 | -0.679362 | -4.210364 |
| C  | -0.053499 | -1.098360 | -2.831295 |
| H  | 0.065330  | 5.059337  | -1.355207 |
| H  | 0.065330  | 5.059337  | 1.355207  |

---

|   |           |           |           |
|---|-----------|-----------|-----------|
| H | -0.036852 | -5.059173 | -1.355008 |
| H | -0.036852 | -5.059173 | 1.355008  |
| H | 0.031080  | 1.355784  | -5.059857 |
| H | 0.031080  | 1.355784  | 5.059857  |
| H | 0.030694  | -1.354137 | -5.059197 |
| H | 0.030694  | -1.354137 | 5.059197  |
| H | 2.153516  | 3.642257  | -3.517327 |
| H | -2.144090 | 3.590646  | -3.715974 |
| H | 2.147977  | -3.664775 | -3.440940 |
| H | -2.139894 | -3.571129 | -3.785361 |
| H | 2.153516  | 3.642257  | 3.517327  |
| H | -2.144090 | 3.590646  | 3.715974  |
| H | 2.147977  | -3.664775 | 3.440940  |
| H | -2.139894 | -3.571129 | 3.785361  |
| H | 2.217996  | 5.400365  | -5.273599 |
| H | -2.088967 | 5.352900  | -5.468235 |
| H | 2.255020  | -5.425333 | -5.192462 |
| H | -2.042483 | -5.334877 | -5.534320 |
| H | 2.217996  | 5.400365  | 5.273599  |
| H | -2.088967 | 5.352900  | 5.468235  |
| H | 2.255020  | -5.425333 | 5.192462  |
| H | -2.042483 | -5.334877 | 5.534320  |
| H | 0.094858  | 6.262180  | -6.257564 |
| H | 0.094858  | 6.262180  | 6.257564  |
| H | 0.156967  | -6.269042 | -6.246077 |
| H | 0.156967  | -6.269042 | 6.246077  |
| N | -2.373157 | -0.006434 | 0.000000  |
| H | -2.748922 | 0.944682  | 0.000000  |
| H | -2.737225 | -0.486201 | -0.826526 |
| H | -2.737225 | -0.486201 | 0.826526  |

**Table S12.** Optimized coordinates ( $\text{\AA}$ ) of the LS CoTPP–NO cluster ( $C_s$ ) at the SR-ZORA, BP86, TZP, spin-restricted level of theory.

|    |           |           |           |
|----|-----------|-----------|-----------|
| Co | -0.083172 | 0.061058  | 0.000000  |
| N  | 1.065793  | 0.891712  | 1.382307  |
| N  | -0.943760 | -1.030220 | -1.382943 |
| N  | 1.065793  | 0.891712  | -1.382307 |
| N  | -0.943760 | -1.030220 | 1.382943  |
| C  | 1.859300  | 2.013871  | 1.220692  |
| C  | 1.133120  | 0.584934  | 2.730341  |
| C  | -0.636875 | -1.103163 | -2.732801 |
| C  | -2.074976 | -1.813095 | -1.221115 |
| C  | 1.859300  | 2.013871  | -1.220692 |
| C  | 1.133120  | 0.584934  | -2.730341 |
| C  | -0.636875 | -1.103163 | 2.732801  |
| C  | -2.074976 | -1.813095 | 1.221115  |
| C  | 2.176476  | 2.613506  | 0.000000  |
| C  | 0.375938  | -0.391802 | -3.379421 |
| C  | 0.375938  | -0.391802 | 3.379421  |
| C  | -2.671308 | -2.133356 | 0.000000  |
| C  | 2.425040  | 2.414615  | 2.484632  |
| C  | -1.572449 | -1.964834 | -3.411197 |
| C  | 2.005918  | 1.508465  | 3.411533  |
| C  | -2.484325 | -2.371475 | -2.484919 |
| C  | 2.425040  | 2.414615  | -2.484632 |
| C  | 2.005918  | 1.508465  | -3.411533 |
| C  | -1.572449 | -1.964834 | 3.411197  |
| C  | -2.484325 | -2.371475 | 2.484919  |
| H  | 3.083948  | 3.265235  | 2.623965  |
| H  | 2.236669  | 1.473185  | 4.471062  |
| H  | -1.535255 | -2.205135 | -4.468478 |
| H  | -3.340895 | -3.022644 | -2.623736 |
| H  | 3.083948  | 3.265235  | -2.623965 |
| H  | -1.535255 | -2.205135 | 4.468478  |
| H  | 2.236669  | 1.473185  | -4.471062 |
| H  | -3.340895 | -3.022644 | 2.623736  |
| C  | 2.975858  | 3.879601  | 0.000000  |
| C  | 0.606242  | -0.624841 | 4.840014  |
| C  | 0.606242  | -0.624841 | -4.840014 |
| C  | -3.923196 | -2.955766 | 0.000000  |
| C  | 4.379256  | 3.856964  | 0.000000  |
| C  | 2.317664  | 5.119108  | 0.000000  |
| C  | 1.666002  | -1.440864 | -5.265187 |
| C  | -0.222386 | -0.032344 | -5.805588 |
| C  | 1.666002  | -1.440864 | 5.265187  |
| C  | -0.222386 | -0.032344 | 5.805588  |
| C  | -3.865028 | -4.358212 | 0.000000  |
| C  | -5.178688 | -2.328723 | 0.000000  |
| C  | 5.108513  | 5.048947  | 0.000000  |
| C  | 3.047034  | 6.310926  | 0.000000  |
| C  | 1.890091  | -1.663083 | -6.626648 |
| C  | 0.002844  | -0.252646 | -7.166661 |
| C  | 1.890091  | -1.663083 | 6.626648  |
| C  | 0.002844  | -0.252646 | 7.166661  |

---

|   |           |           |           |
|---|-----------|-----------|-----------|
| C | -5.037837 | -5.117659 | 0.000000  |
| C | -6.351535 | -3.088770 | 0.000000  |
| C | 4.444127  | 6.278770  | 0.000000  |
| C | 1.058924  | -1.069748 | 7.580651  |
| C | 1.058924  | -1.069748 | -7.580651 |
| C | -6.283976 | -4.484603 | 0.000000  |
| H | 4.898135  | 2.897150  | 0.000000  |
| H | 1.227057  | 5.143127  | 0.000000  |
| H | 2.314170  | -1.904553 | -4.520229 |
| H | -1.045133 | 0.606926  | -5.482328 |
| H | 2.314170  | -1.904553 | 4.520229  |
| H | -1.045133 | 0.606926  | 5.482328  |
| H | -2.892404 | -4.852611 | 0.000000  |
| H | -5.230062 | -1.239142 | 0.000000  |
| H | 6.199133  | 5.015771  | 0.000000  |
| H | 2.520689  | 7.266561  | 0.000000  |
| H | 2.716220  | -2.302482 | -6.941675 |
| H | -0.648261 | 0.217612  | -7.905312 |
| H | 2.716220  | -2.302482 | 6.941675  |
| H | -0.648261 | 0.217612  | 7.905312  |
| H | -4.976911 | -6.207138 | 0.000000  |
| H | -7.320529 | -2.587472 | 0.000000  |
| H | 5.013991  | 7.209074  | 0.000000  |
| H | 1.233978  | -1.242818 | 8.643576  |
| H | 1.233978  | -1.242818 | -8.643576 |
| H | -7.199499 | -5.077865 | 0.000000  |
| N | -1.288775 | 1.404477  | 0.000000  |
| O | -2.458227 | 1.211738  | 0.000000  |

**Table S13.** Optimized coordinates (Å) of the LS CoTPP-NO<sub>2</sub> cluster (C<sub>2v</sub>) at the SR-ZORA, BP86, TZP, spin-restricted level of theory.

|    |           |           |           |
|----|-----------|-----------|-----------|
| Co | 0.000000  | 0.000000  | -0.225771 |
| N  | 1.385389  | 1.385097  | -0.022055 |
| N  | -1.385389 | -1.385097 | -0.022055 |
| N  | 1.385389  | -1.385097 | -0.022055 |
| N  | -1.385389 | 1.385097  | -0.022055 |
| C  | 2.749686  | 1.219553  | -0.208416 |
| C  | 1.219357  | 2.743951  | 0.209720  |
| C  | -1.219357 | -2.743951 | 0.209720  |
| C  | -2.749686 | -1.219553 | -0.208416 |
| C  | 2.749686  | -1.219553 | -0.208416 |
| C  | 1.219357  | -2.743951 | 0.209720  |
| C  | -1.219357 | 2.743951  | 0.209720  |
| C  | -2.749686 | 1.219553  | -0.208416 |
| C  | 3.405937  | 0.000000  | -0.363504 |
| C  | 0.000000  | -3.399136 | 0.370510  |
| C  | 0.000000  | 3.399136  | 0.370510  |
| C  | -3.405937 | 0.000000  | -0.363504 |
| C  | 3.434024  | 2.481380  | -0.098339 |
| C  | -2.491040 | -3.419177 | 0.192617  |
| C  | 2.491040  | 3.419177  | 0.192617  |
| C  | -3.434024 | -2.481380 | -0.098339 |
| C  | 3.434024  | -2.481380 | -0.098339 |
| C  | 2.491040  | -3.419177 | 0.192617  |
| C  | -2.491040 | 3.419177  | 0.192617  |
| C  | -3.434024 | 2.481380  | -0.098339 |
| H  | 4.506022  | 2.611038  | -0.202829 |
| H  | 2.625669  | 4.481558  | 0.366465  |
| H  | -2.625669 | -4.481558 | 0.366465  |
| H  | -4.506022 | -2.611038 | -0.202829 |
| H  | 4.506022  | -2.611038 | -0.202829 |
| H  | -2.625669 | 4.481558  | 0.366465  |
| H  | 2.625669  | -4.481558 | 0.366465  |
| H  | -4.506022 | 2.611038  | -0.202829 |
| C  | 4.883706  | 0.000000  | -0.606050 |
| C  | 0.000000  | 4.867198  | 0.668882  |
| C  | 0.000000  | -4.867198 | 0.668882  |
| C  | -4.883706 | 0.000000  | -0.606050 |
| C  | 5.790965  | 0.000000  | 0.464753  |
| C  | 5.379321  | 0.000000  | -1.918843 |
| C  | 0.000000  | -5.315528 | 1.998740  |
| C  | 0.000000  | -5.814123 | -0.366837 |
| C  | 0.000000  | 5.315528  | 1.998740  |
| C  | 0.000000  | 5.814123  | -0.366837 |
| C  | -5.790965 | 0.000000  | 0.464753  |
| C  | -5.379321 | 0.000000  | -1.918843 |
| C  | 7.167966  | 0.000000  | 0.227719  |
| C  | 6.756907  | 0.000000  | -2.154499 |
| C  | 0.000000  | -6.683141 | 2.286924  |
| C  | 0.000000  | -7.181339 | -0.078053 |
| C  | 0.000000  | 6.683141  | 2.286924  |
| C  | 0.000000  | 7.181339  | -0.078053 |



---

|   |           |           |           |
|---|-----------|-----------|-----------|
| C | -7.167966 | 0.000000  | 0.227719  |
| C | -6.756907 | 0.000000  | -2.154499 |
| C | 7.653991  | 0.000000  | -1.082770 |
| C | 0.000000  | 7.619180  | 1.249343  |
| C | 0.000000  | -7.619180 | 1.249343  |
| C | -7.653991 | 0.000000  | -1.082770 |
| H | 5.411047  | 0.000000  | 1.487539  |
| H | 4.677059  | 0.000000  | -2.753406 |
| H | 0.000000  | -4.585442 | 2.809402  |
| H | 0.000000  | -5.472073 | -1.402948 |
| H | 0.000000  | 4.585442  | 2.809402  |
| H | 0.000000  | 5.472073  | -1.402948 |
| H | -5.411047 | 0.000000  | 1.487539  |
| H | -4.677059 | 0.000000  | -2.753406 |
| H | 7.861846  | 0.000000  | 1.069776  |
| H | 7.129311  | 0.000000  | -3.179946 |
| H | 0.000000  | -7.016842 | 3.325690  |
| H | 0.000000  | -7.905702 | -0.893883 |
| H | 0.000000  | 7.016842  | 3.325690  |
| H | 0.000000  | 7.905702  | -0.893883 |
| H | -7.861846 | 0.000000  | 1.069776  |
| H | -7.129311 | 0.000000  | -3.179946 |
| H | 8.729114  | 0.000000  | -1.267908 |
| H | 0.000000  | 8.686670  | 1.474354  |
| H | 0.000000  | -8.686670 | 1.474354  |
| H | -8.729114 | 0.000000  | -1.267908 |
| N | 0.000000  | 0.000000  | -2.107458 |
| O | -1.096721 | 0.000000  | -2.674464 |
| O | 1.096721  | 0.000000  | -2.674464 |

**Table S14.** Optimized coordinates (Å) of the LS CoTPP–O<sub>2</sub> cluster (C<sub>s</sub>) at the SR-ZORA, BP86, TZP, spin-unrestricted level of theory.

|    |           |           |           |
|----|-----------|-----------|-----------|
| Co | -0.093828 | 0.074786  | 0.000000  |
| N  | 1.015598  | 0.934233  | 1.373235  |
| N  | -0.938511 | -1.024578 | -1.375058 |
| N  | 1.015598  | 0.934233  | -1.373235 |
| N  | -0.938511 | -1.024578 | 1.375058  |
| C  | 1.778500  | 2.081116  | 1.219257  |
| C  | 1.114101  | 0.607316  | 2.716149  |
| C  | -0.608863 | -1.123314 | -2.717257 |
| C  | -2.080445 | -1.790660 | -1.220022 |
| C  | 1.778500  | 2.081116  | -1.219257 |
| C  | 1.114101  | 0.607316  | -2.716149 |
| C  | -0.608863 | -1.123314 | 2.717257  |
| C  | -2.080445 | -1.790660 | 1.220022  |
| C  | 2.086353  | 2.687837  | 0.000000  |
| C  | 0.404923  | -0.409591 | -3.357896 |
| C  | 0.404923  | -0.409591 | 3.357896  |
| C  | -2.688361 | -2.093357 | 0.000000  |
| C  | 2.346218  | 2.480121  | 2.482116  |
| C  | -1.538416 | -1.990264 | -3.396976 |
| C  | 1.969651  | 1.545182  | 3.398789  |
| C  | -2.474410 | -2.365861 | -2.481224 |
| C  | 2.346218  | 2.480121  | -2.482116 |
| C  | 1.969651  | 1.545182  | -3.398789 |
| C  | -1.538416 | -1.990264 | 3.396976  |
| C  | -2.474410 | -2.365861 | 2.481224  |
| H  | 2.980473  | 3.348613  | 2.626691  |
| H  | 2.218612  | 1.498299  | 4.453929  |
| H  | -1.484886 | -2.247691 | -4.449691 |
| H  | -3.338399 | -3.006318 | -2.624993 |
| H  | 2.980473  | 3.348613  | -2.626691 |
| H  | -1.484886 | -2.247691 | 4.449691  |
| H  | 2.218612  | 1.498299  | -4.453929 |
| H  | -3.338399 | -3.006318 | 2.624993  |
| C  | 2.894022  | 3.949162  | 0.000000  |
| C  | 0.684295  | -0.689670 | 4.802031  |
| C  | 0.684295  | -0.689670 | -4.802031 |
| C  | -3.957956 | -2.885812 | 0.000000  |
| C  | 4.297169  | 3.905317  | 0.000000  |
| C  | 2.254160  | 5.198120  | 0.000000  |
| C  | 1.721963  | -1.565728 | -5.155428 |
| C  | -0.080846 | -0.098468 | -5.819522 |
| C  | 1.721963  | -1.565728 | 5.155428  |
| C  | -0.080846 | -0.098468 | 5.819522  |
| C  | -3.935159 | -4.289115 | 0.000000  |
| C  | -5.195640 | -2.224725 | 0.000000  |
| C  | 5.044845  | 5.085684  | 0.000000  |
| C  | 3.002627  | 6.378467  | 0.000000  |
| C  | 1.985039  | -1.850742 | -6.497822 |
| C  | 0.183403  | -0.382645 | -7.161984 |
| C  | 1.985039  | -1.850742 | 6.497822  |
| C  | 0.183403  | -0.382645 | 7.161984  |

---

|   |           |           |           |
|---|-----------|-----------|-----------|
| C | -5.127485 | -5.017581 | 0.000000  |
| C | -6.387493 | -2.954322 | 0.000000  |
| C | 4.399155  | 6.325256  | 0.000000  |
| C | 1.215566  | -1.261039 | 7.504451  |
| C | 1.215566  | -1.261039 | -7.504451 |
| C | -6.356368 | -4.351669 | 0.000000  |
| H | 4.801652  | 2.937891  | 0.000000  |
| H | 1.163996  | 5.239624  | 0.000000  |
| H | 2.320943  | -2.028280 | -4.369600 |
| H | -0.887604 | 0.585909  | -5.552294 |
| H | 2.320943  | -2.028280 | 4.369600  |
| H | -0.887604 | 0.585909  | 5.552294  |
| H | -2.975640 | -4.808476 | 0.000000  |
| H | -5.216158 | -1.134235 | 0.000000  |
| H | 6.134879  | 5.035662  | 0.000000  |
| H | 2.491307  | 7.342148  | 0.000000  |
| H | 2.791477  | -2.538782 | -6.756557 |
| H | -0.421391 | 0.082241  | -7.942209 |
| H | 2.791477  | -2.538782 | 6.756557  |
| H | -0.421391 | 0.082241  | 7.942209  |
| H | -5.094937 | -6.108256 | 0.000000  |
| H | -7.342811 | -2.427538 | 0.000000  |
| H | 4.983264  | 7.246681  | 0.000000  |
| H | 1.418081  | -1.486788 | 8.552499  |
| H | 1.418081  | -1.486788 | -8.552499 |
| H | -7.287056 | -4.920840 | 0.000000  |
| O | -1.346154 | 1.447836  | 0.000000  |
| O | -2.600547 | 1.166532  | 0.000000  |

**Table S15.** Optimized coordinates (Å) of the LS Cu–CoTPP–CO cluster ( $C_{4v}$ ) at the SR-ZORA, BP86, TZP, spin-restricted level of theory.

|    |           |           |           |
|----|-----------|-----------|-----------|
| Co | 0.000000  | 0.000000  | -0.023675 |
| N  | 0.000000  | 1.997992  | 0.095059  |
| N  | 0.000000  | -1.997992 | 0.095059  |
| N  | 1.997992  | 0.000000  | 0.095059  |
| N  | -1.997992 | 0.000000  | 0.095059  |
| C  | 1.099986  | 2.834725  | 0.090516  |
| C  | -1.099986 | 2.834725  | 0.090516  |
| C  | 1.099986  | -2.834725 | 0.090516  |
| C  | -1.099986 | -2.834725 | 0.090516  |
| C  | 2.834725  | 1.099986  | 0.090516  |
| C  | 2.834725  | -1.099986 | 0.090516  |
| C  | -2.834725 | 1.099986  | 0.090516  |
| C  | -2.834725 | -1.099986 | 0.090516  |
| C  | 2.438600  | 2.438600  | 0.074029  |
| C  | 2.438600  | -2.438600 | 0.074029  |
| C  | -2.438600 | 2.438600  | 0.074029  |
| C  | -2.438600 | -2.438600 | 0.074029  |
| C  | 0.680426  | 4.214590  | 0.093202  |
| C  | 0.680426  | -4.214590 | 0.093202  |
| C  | -0.680426 | 4.214590  | 0.093202  |
| C  | -0.680426 | -4.214590 | 0.093202  |
| C  | 4.214590  | 0.680426  | 0.093202  |
| C  | 4.214590  | -0.680426 | 0.093202  |
| C  | -4.214590 | 0.680426  | 0.093202  |
| C  | -4.214590 | -0.680426 | 0.093202  |
| H  | 1.356220  | 5.063087  | 0.095012  |
| H  | -1.356220 | 5.063087  | 0.095012  |
| H  | 1.356220  | -5.063087 | 0.095012  |
| H  | -1.356220 | -5.063087 | 0.095012  |
| H  | 5.063087  | 1.356220  | 0.095012  |
| H  | -5.063087 | 1.356220  | 0.095012  |
| H  | 5.063087  | -1.356220 | 0.095012  |
| H  | -5.063087 | -1.356220 | 0.095012  |
| C  | 3.497269  | 3.497269  | -0.006293 |
| C  | -3.497269 | 3.497269  | -0.006293 |
| C  | 3.497269  | -3.497269 | -0.006293 |
| C  | -3.497269 | -3.497269 | -0.006293 |
| C  | 4.056885  | 4.056885  | 1.152194  |
| C  | 3.945709  | 3.945709  | -1.259052 |
| C  | 4.056885  | -4.056885 | 1.152194  |
| C  | 3.945709  | -3.945709 | -1.259052 |
| C  | -4.056885 | 4.056885  | 1.152194  |
| C  | -3.945709 | 3.945709  | -1.259052 |
| C  | -4.056885 | -4.056885 | 1.152194  |
| C  | -3.945709 | -3.945709 | -1.259052 |
| C  | 5.043337  | 5.043337  | 1.059462  |
| C  | 4.931514  | 4.931514  | -1.351766 |
| C  | 5.043337  | -5.043337 | 1.059462  |
| C  | 4.931514  | -4.931514 | -1.351766 |
| C  | -5.043337 | 5.043337  | 1.059462  |
| C  | -4.931514 | 4.931514  | -1.351766 |

---

|    |           |           |           |
|----|-----------|-----------|-----------|
| C  | -5.043337 | -5.043337 | 1.059462  |
| C  | -4.931514 | -4.931514 | -1.351766 |
| C  | 5.482921  | 5.482921  | -0.192120 |
| C  | -5.482921 | 5.482921  | -0.192120 |
| C  | 5.482921  | -5.482921 | -0.192120 |
| C  | -5.482921 | -5.482921 | -0.192120 |
| H  | 3.713902  | 3.713902  | 2.129528  |
| H  | 3.515133  | 3.515133  | -2.164375 |
| H  | 3.713902  | -3.713902 | 2.129528  |
| H  | 3.515133  | -3.515133 | -2.164375 |
| H  | -3.713902 | 3.713902  | 2.129528  |
| H  | -3.515133 | 3.515133  | -2.164375 |
| H  | -3.713902 | -3.713902 | 2.129528  |
| H  | -3.515133 | -3.515133 | -2.164375 |
| H  | 5.469416  | 5.469416  | 1.968959  |
| H  | 5.268866  | 5.268866  | -2.332996 |
| H  | 5.469416  | -5.469416 | 1.968959  |
| H  | 5.268866  | -5.268866 | -2.332996 |
| H  | -5.469416 | 5.469416  | 1.968959  |
| H  | -5.268866 | 5.268866  | -2.332996 |
| H  | -5.469416 | -5.469416 | 1.968959  |
| H  | -5.268866 | -5.268866 | -2.332996 |
| H  | 6.252700  | 6.252700  | -0.264007 |
| H  | -6.252700 | 6.252700  | -0.264007 |
| H  | 6.252700  | -6.252700 | -0.264007 |
| H  | -6.252700 | -6.252700 | -0.264007 |
| C  | 0.000000  | 0.000000  | -1.907196 |
| O  | 0.000000  | 0.000000  | -3.060782 |
| Cu | 0.000000  | 0.000000  | 2.319456  |

**Table S16.** Optimized coordinates (Å) of the LS Ag–CoTPP–CO cluster ( $C_{4v}$ ) at the SR-ZORA, BP86, TZP, spin-restricted level of theory.

|    |           |           |           |
|----|-----------|-----------|-----------|
| Co | 0.000000  | 0.000000  | -0.197261 |
| N  | 0.000000  | 1.999222  | -0.070306 |
| N  | 0.000000  | -1.999222 | -0.070306 |
| N  | 1.999222  | 0.000000  | -0.070306 |
| N  | -1.999222 | 0.000000  | -0.070306 |
| C  | 1.100120  | 2.835858  | -0.048948 |
| C  | -1.100120 | 2.835858  | -0.048948 |
| C  | 1.100120  | -2.835858 | -0.048948 |
| C  | -1.100120 | -2.835858 | -0.048948 |
| C  | 2.835858  | 1.100120  | -0.048948 |
| C  | 2.835858  | -1.100120 | -0.048948 |
| C  | -2.835858 | 1.100120  | -0.048948 |
| C  | -2.835858 | -1.100120 | -0.048948 |
| C  | 2.438694  | 2.438694  | -0.037898 |
| C  | 2.438694  | -2.438694 | -0.037898 |
| C  | -2.438694 | 2.438694  | -0.037898 |
| C  | -2.438694 | -2.438694 | -0.037898 |
| C  | 0.680322  | 4.215902  | -0.018950 |
| C  | 0.680322  | -4.215902 | -0.018950 |
| C  | -0.680322 | 4.215902  | -0.018950 |
| C  | -0.680322 | -4.215902 | -0.018950 |
| C  | 4.215902  | 0.680322  | -0.018950 |
| C  | 4.215902  | -0.680322 | -0.018950 |
| C  | -4.215902 | 0.680322  | -0.018950 |
| C  | -4.215902 | -0.680322 | -0.018950 |
| H  | 1.355308  | 5.064920  | 0.003567  |
| H  | -1.355308 | 5.064920  | 0.003567  |
| H  | 1.355308  | -5.064920 | 0.003567  |
| H  | -1.355308 | -5.064920 | 0.003567  |
| H  | 5.064920  | 1.355308  | 0.003567  |
| H  | -5.064920 | 1.355308  | 0.003567  |
| H  | 5.064920  | -1.355308 | 0.003567  |
| H  | -5.064920 | -1.355308 | 0.003567  |
| C  | 3.498324  | 3.498324  | 0.013369  |
| C  | -3.498324 | 3.498324  | 0.013369  |
| C  | 3.498324  | -3.498324 | 0.013369  |
| C  | -3.498324 | -3.498324 | 0.013369  |
| C  | 3.970843  | 3.970843  | 1.247816  |
| C  | 4.035221  | 4.035221  | -1.166783 |
| C  | 3.970843  | -3.970843 | 1.247816  |
| C  | 4.035221  | -4.035221 | -1.166783 |
| C  | -3.970843 | 3.970843  | 1.247816  |
| C  | -4.035221 | 4.035221  | -1.166783 |
| C  | -3.970843 | -3.970843 | 1.247816  |
| C  | -4.035221 | -4.035221 | -1.166783 |
| C  | 4.958259  | 4.958259  | 1.301222  |
| C  | 5.022827  | 5.022827  | -1.113670 |
| C  | 4.958259  | -4.958259 | 1.301222  |
| C  | 5.022827  | -5.022827 | -1.113670 |
| C  | -4.958259 | 4.958259  | 1.301222  |
| C  | -5.022827 | 5.022827  | -1.113670 |

---

|    |           |           |           |
|----|-----------|-----------|-----------|
| C  | -4.958259 | -4.958259 | 1.301222  |
| C  | -5.022827 | -5.022827 | -1.113670 |
| C  | 5.486814  | 5.486814  | 0.120280  |
| C  | -5.486814 | 5.486814  | 0.120280  |
| C  | 5.486814  | -5.486814 | 0.120280  |
| C  | -5.486814 | -5.486814 | 0.120280  |
| H  | 3.558078  | 3.558078  | 2.169515  |
| H  | 3.673430  | 3.673430  | -2.130371 |
| H  | 3.558078  | -3.558078 | 2.169515  |
| H  | 3.673430  | -3.673430 | -2.130371 |
| H  | -3.558078 | 3.558078  | 2.169515  |
| H  | -3.673430 | 3.673430  | -2.130371 |
| H  | -3.558078 | -3.558078 | 2.169515  |
| H  | -3.673430 | -3.673430 | -2.130371 |
| H  | 5.314882  | 5.314882  | 2.268982  |
| H  | 5.430312  | 5.430312  | -2.040282 |
| H  | 5.314882  | -5.314882 | 2.268982  |
| H  | 5.430312  | -5.430312 | -2.040282 |
| H  | -5.314882 | 5.314882  | 2.268982  |
| H  | -5.430312 | 5.430312  | -2.040282 |
| H  | -5.314882 | -5.314882 | 2.268982  |
| H  | -5.430312 | -5.430312 | -2.040282 |
| H  | 6.257663  | 6.257663  | 0.161512  |
| H  | -6.257663 | 6.257663  | 0.161512  |
| H  | 6.257663  | -6.257663 | 0.161512  |
| H  | -6.257663 | -6.257663 | 0.161512  |
| C  | 0.000000  | 0.000000  | -2.074707 |
| O  | 0.000000  | 0.000000  | -3.228478 |
| Ag | 0.000000  | 0.000000  | 2.371817  |

**Table S17.** Optimized coordinates (Å) of the LS Au–CoTPP–CO cluster ( $C_{4v}$ ) at the SR-ZORA, BP86, TZP, spin-restricted level of theory.

|    |           |           |           |
|----|-----------|-----------|-----------|
| Co | 0.000000  | 0.000000  | -0.069002 |
| N  | 0.000000  | 2.001384  | 0.010261  |
| N  | 0.000000  | -2.001384 | 0.010261  |
| N  | 2.001384  | 0.000000  | 0.010261  |
| N  | -2.001384 | 0.000000  | 0.010261  |
| C  | 1.101308  | 2.835620  | 0.014768  |
| C  | -1.101308 | 2.835620  | 0.014768  |
| C  | 1.101308  | -2.835620 | 0.014768  |
| C  | -1.101308 | -2.835620 | 0.014768  |
| C  | 2.835620  | 1.101308  | 0.014768  |
| C  | 2.835620  | -1.101308 | 0.014768  |
| C  | -2.835620 | 1.101308  | 0.014768  |
| C  | -2.835620 | -1.101308 | 0.014768  |
| C  | 2.439872  | 2.439872  | 0.009524  |
| C  | 2.439872  | -2.439872 | 0.009524  |
| C  | -2.439872 | 2.439872  | 0.009524  |
| C  | -2.439872 | -2.439872 | 0.009524  |
| C  | 0.680252  | 4.215007  | 0.027799  |
| C  | 0.680252  | -4.215007 | 0.027799  |
| C  | -0.680252 | 4.215007  | 0.027799  |
| C  | -0.680252 | -4.215007 | 0.027799  |
| C  | 4.215007  | 0.680252  | 0.027799  |
| C  | 4.215007  | -0.680252 | 0.027799  |
| C  | -4.215007 | 0.680252  | 0.027799  |
| C  | -4.215007 | -0.680252 | 0.027799  |
| H  | 1.355936  | 5.063545  | 0.040910  |
| H  | -1.355936 | 5.063545  | 0.040910  |
| H  | 1.355936  | -5.063545 | 0.040910  |
| H  | -1.355936 | -5.063545 | 0.040910  |
| H  | 5.063545  | 1.355936  | 0.040910  |
| H  | -5.063545 | 1.355936  | 0.040910  |
| H  | 5.063545  | -1.355936 | 0.040910  |
| H  | -5.063545 | -1.355936 | 0.040910  |
| C  | 3.499738  | 3.499738  | -0.027220 |
| C  | -3.499738 | 3.499738  | -0.027220 |
| C  | 3.499738  | -3.499738 | -0.027220 |
| C  | -3.499738 | -3.499738 | -0.027220 |
| C  | 4.031351  | 4.031351  | 1.157645  |
| C  | 3.976892  | 3.976892  | -1.258210 |
| C  | 4.031351  | -4.031351 | 1.157645  |
| C  | 3.976892  | -3.976892 | -1.258210 |
| C  | -4.031351 | 4.031351  | 1.157645  |
| C  | -3.976892 | 3.976892  | -1.258210 |
| C  | -4.031351 | -4.031351 | 1.157645  |
| C  | -3.976892 | -3.976892 | -1.258210 |
| C  | 5.019315  | 5.019315  | 1.111286  |
| C  | 4.964395  | 4.964395  | -1.304256 |
| C  | 5.019315  | -5.019315 | 1.111286  |
| C  | 4.964395  | -4.964395 | -1.304256 |
| C  | -5.019315 | 5.019315  | 1.111286  |
| C  | -4.964395 | 4.964395  | -1.304256 |



---

|    |           |           |           |
|----|-----------|-----------|-----------|
| C  | -5.019315 | -5.019315 | 1.111286  |
| C  | -4.964395 | -4.964395 | -1.304256 |
| C  | 5.488128  | 5.488128  | -0.119101 |
| C  | -5.488128 | 5.488128  | -0.119101 |
| C  | 5.488128  | -5.488128 | -0.119101 |
| C  | -5.488128 | -5.488128 | -0.119101 |
| H  | 3.665172  | 3.665172  | 2.117857  |
| H  | 3.568195  | 3.568195  | -2.183526 |
| H  | 3.665172  | -3.665172 | 2.117857  |
| H  | 3.568195  | -3.568195 | -2.183526 |
| H  | -3.665172 | 3.665172  | 2.117857  |
| H  | -3.568195 | 3.568195  | -2.183526 |
| H  | -3.665172 | -3.665172 | 2.117857  |
| H  | -3.568195 | -3.568195 | -2.183526 |
| H  | 5.423572  | 5.423572  | 2.040662  |
| H  | 5.324555  | 5.324555  | -2.269277 |
| H  | 5.423572  | -5.423572 | 2.040662  |
| H  | 5.324555  | -5.324555 | -2.269277 |
| H  | -5.423572 | 5.423572  | 2.040662  |
| H  | -5.324555 | 5.324555  | -2.269277 |
| H  | -5.423572 | -5.423572 | 2.040662  |
| H  | -5.324555 | -5.324555 | -2.269277 |
| H  | 6.259157  | 6.259157  | -0.154599 |
| H  | -6.259157 | 6.259157  | -0.154599 |
| H  | 6.259157  | -6.259157 | -0.154599 |
| H  | -6.259157 | -6.259157 | -0.154599 |
| C  | 0.000000  | 0.000000  | -1.890884 |
| O  | 0.000000  | 0.000000  | -3.043338 |
| Au | 0.000000  | 0.000000  | 2.453447  |

**Table S18.** Optimized coordinates (Å) of the LS Cu–CoTPP–NH<sub>3</sub> (C<sub>s</sub>) cluster at the SR-ZORA, BP86, TZP, spin-restricted level of theory.

|    |           |           |           |
|----|-----------|-----------|-----------|
| Co | -0.029672 | 0.009156  | 0.000000  |
| N  | -0.002553 | 0.005436  | 1.985150  |
| N  | 0.021361  | 1.989773  | 0.000000  |
| N  | -0.059649 | -1.975289 | 0.000000  |
| N  | -0.002553 | 0.005436  | -1.985150 |
| C  | -0.016080 | -5.516293 | 5.454277  |
| C  | 1.177385  | -4.889334 | 5.084889  |
| C  | 1.172489  | -3.886714 | 4.111106  |
| C  | -0.024989 | -3.496057 | 3.491642  |
| C  | -1.217792 | -4.131571 | 3.871013  |
| C  | -1.214390 | -5.134016 | 4.845008  |
| C  | -0.027615 | -2.431568 | 2.437085  |
| C  | 0.007007  | -1.094223 | 2.831554  |
| C  | 0.025744  | 1.103392  | 2.832341  |
| C  | 0.056385  | 0.683663  | 4.211255  |
| C  | 0.039295  | -0.676613 | 4.210705  |
| C  | 0.024301  | 2.441860  | 2.437955  |
| C  | 0.022199  | 3.501023  | 3.495202  |
| C  | 1.191105  | 4.219255  | 3.791995  |
| C  | 1.187033  | 5.211848  | 4.775121  |
| C  | 0.012409  | 5.502385  | 5.475047  |
| C  | -1.157158 | 4.792529  | 5.187872  |
| C  | -1.151366 | 3.799169  | 4.205446  |
| C  | 0.015919  | 2.836199  | -1.099283 |
| C  | -0.018135 | 4.215001  | -0.680076 |
| C  | -0.018135 | 4.215001  | 0.680076  |
| C  | 0.015919  | 2.836199  | 1.099283  |
| C  | 0.024301  | 2.441860  | -2.437955 |
| C  | 0.022199  | 3.501023  | -3.495202 |
| C  | 1.191105  | 4.219255  | -3.791995 |
| C  | 1.187033  | 5.211848  | -4.775121 |
| C  | 0.012409  | 5.502385  | -5.475047 |
| C  | -1.157158 | 4.792529  | -5.187872 |
| C  | -1.151366 | 3.799169  | -4.205446 |
| C  | -0.060580 | -2.822491 | -1.098466 |
| C  | -0.070525 | -4.202020 | -0.679891 |
| C  | -0.070525 | -4.202020 | 0.679891  |
| C  | -0.060580 | -2.822491 | 1.098466  |
| C  | -0.027615 | -2.431568 | -2.437085 |
| C  | -0.024989 | -3.496057 | -3.491642 |
| C  | 1.172489  | -3.886714 | -4.111106 |
| C  | 1.177385  | -4.889334 | -5.084889 |
| C  | -0.016080 | -5.516293 | -5.454277 |
| C  | -1.214390 | -5.134016 | -4.845008 |
| C  | -1.217792 | -4.131571 | -3.871013 |
| C  | 0.025744  | 1.103392  | -2.832341 |
| C  | 0.056385  | 0.683663  | -4.211255 |
| C  | 0.039295  | -0.676613 | -4.210705 |
| C  | 0.007007  | -1.094223 | -2.831554 |
| H  | -0.046302 | 5.064751  | -1.353497 |
| H  | -0.046302 | 5.064751  | 1.353497  |

---

|    |           |           |           |
|----|-----------|-----------|-----------|
| H  | -0.066841 | -5.052068 | -1.353725 |
| H  | -0.066841 | -5.052068 | 1.353725  |
| H  | 0.086863  | 1.357153  | -5.061318 |
| H  | 0.086863  | 1.357153  | 5.061318  |
| H  | 0.048408  | -1.351740 | -5.060001 |
| H  | 0.048408  | -1.351740 | 5.060001  |
| H  | 2.107744  | 3.990977  | -3.246868 |
| H  | -2.064825 | 3.247059  | -3.980412 |
| H  | 2.105090  | -3.402297 | -3.818497 |
| H  | -2.153982 | -3.835322 | -3.395352 |
| H  | 2.107744  | 3.990977  | 3.246868  |
| H  | -2.064825 | 3.247059  | 3.980412  |
| H  | 2.105090  | -3.402297 | 3.818497  |
| H  | -2.153982 | -3.835322 | 3.395352  |
| H  | 2.105122  | 5.758461  | -4.995721 |
| H  | -2.078785 | 5.014822  | -5.728476 |
| H  | 2.117897  | -5.184970 | -5.552231 |
| H  | -2.150522 | -5.617601 | -5.128642 |
| H  | 2.105122  | 5.758461  | 4.995721  |
| H  | -2.078785 | 5.014822  | 5.728476  |
| H  | 2.117897  | -5.184970 | 5.552231  |
| H  | -2.150522 | -5.617601 | 5.128642  |
| H  | 0.008192  | 6.278805  | -6.241594 |
| H  | 0.008192  | 6.278805  | 6.241594  |
| H  | -0.012247 | -6.301492 | -6.212406 |
| H  | -0.012247 | -6.301492 | 6.212406  |
| N  | -2.227677 | 0.044069  | 0.000000  |
| H  | -2.578794 | 1.005294  | 0.000000  |
| H  | -2.602000 | -0.426949 | -0.827541 |
| H  | -2.602000 | -0.426949 | 0.827541  |
| Cu | 2.274756  | -0.035064 | 0.000000  |

**Table S19.** Optimized coordinates ( $\text{\AA}$ ) of the LS Ag–CoTPP–NH<sub>3</sub> (C<sub>s</sub>) cluster at the SR-ZORA, BP86, TZP, spin-restricted level of theory.

|    |           |           |           |
|----|-----------|-----------|-----------|
| Co | -0.025312 | 0.006710  | 0.000000  |
| N  | 0.019389  | 0.004183  | 1.983379  |
| N  | -0.020258 | 1.986635  | 0.000000  |
| N  | -0.026403 | -1.976246 | 0.000000  |
| N  | 0.019389  | 0.004183  | -1.983379 |
| C  | 0.051563  | -5.497938 | 5.473321  |
| C  | 1.245684  | -5.085658 | 4.874479  |
| C  | 1.231850  | -4.093320 | 3.890463  |
| C  | 0.025483  | -3.494964 | 3.493799  |
| C  | -1.167097 | -3.914074 | 4.104007  |
| C  | -1.155492 | -4.910632 | 5.084170  |
| C  | 0.011461  | -2.432393 | 2.436105  |
| C  | 0.062076  | -1.095184 | 2.829320  |
| C  | 0.066220  | 1.102587  | 2.829572  |
| C  | 0.151320  | 0.683566  | 4.206667  |
| C  | 0.149162  | -0.676915 | 4.206262  |
| C  | 0.018579  | 2.440119  | 2.436183  |
| C  | 0.034463  | 3.497888  | 3.497661  |
| C  | 1.234340  | 4.130757  | 3.857639  |
| C  | 1.252126  | 5.110314  | 4.854340  |
| C  | 0.069112  | 5.472478  | 5.504499  |
| C  | -1.131890 | 4.850213  | 5.152222  |
| C  | -1.147654 | 3.868463  | 4.157649  |
| C  | -0.041293 | 2.833204  | -1.099073 |
| C  | -0.110082 | 4.211400  | -0.680206 |
| C  | -0.110082 | 4.211400  | 0.680206  |
| C  | -0.041293 | 2.833204  | 1.099073  |
| C  | 0.018579  | 2.440119  | -2.436183 |
| C  | 0.034463  | 3.497888  | -3.497661 |
| C  | 1.234340  | 4.130757  | -3.857639 |
| C  | 1.252126  | 5.110314  | -4.854340 |
| C  | 0.069112  | 5.472478  | -5.504499 |
| C  | -1.131890 | 4.850213  | -5.152222 |
| C  | -1.147654 | 3.868463  | -4.157649 |
| C  | -0.046530 | -2.823677 | -1.098541 |
| C  | -0.111239 | -4.202155 | -0.680186 |
| C  | -0.111239 | -4.202155 | 0.680186  |
| C  | -0.046530 | -2.823677 | 1.098541  |
| C  | 0.011461  | -2.432393 | -2.436105 |
| C  | 0.025483  | -3.494964 | -3.493799 |
| C  | 1.231850  | -4.093320 | -3.890463 |
| C  | 1.245684  | -5.085658 | -4.874479 |
| C  | 0.051563  | -5.497938 | -5.473321 |
| C  | -1.155492 | -4.910632 | -5.084170 |
| C  | -1.167097 | -3.914074 | -4.104007 |
| C  | 0.066220  | 1.102587  | -2.829572 |
| C  | 0.151320  | 0.683566  | -4.206667 |
| C  | 0.149162  | -0.676915 | -4.206262 |
| C  | 0.062076  | -1.095184 | -2.829320 |
| H  | -0.147646 | 5.060096  | -1.355428 |
| H  | -0.147646 | 5.060096  | 1.355428  |

---

|    |           |           |           |
|----|-----------|-----------|-----------|
| H  | -0.145722 | -5.050796 | -1.355572 |
| H  | -0.145722 | -5.050796 | 1.355572  |
| H  | 0.206732  | 1.357929  | -5.054652 |
| H  | 0.206732  | 1.357929  | 5.054652  |
| H  | 0.201501  | -1.352517 | -5.053731 |
| H  | 0.201501  | -1.352517 | 5.053731  |
| H  | 2.158138  | 3.845048  | -3.352261 |
| H  | -2.085357 | 3.381663  | -3.884612 |
| H  | 2.163927  | -3.771562 | -3.423435 |
| H  | -2.110795 | -3.457252 | -3.801046 |
| H  | 2.158138  | 3.845048  | 3.352261  |
| H  | -2.085357 | 3.381663  | 3.884612  |
| H  | 2.163927  | -3.771562 | 3.423435  |
| H  | -2.110795 | -3.457252 | 3.801046  |
| H  | 2.194186  | 5.588911  | -5.126484 |
| H  | -2.060108 | 5.129153  | -5.653595 |
| H  | 2.192536  | -5.537728 | -5.174367 |
| H  | -2.092634 | -5.228608 | -5.544509 |
| H  | 2.194186  | 5.588911  | 5.126484  |
| H  | -2.060108 | 5.129153  | 5.653595  |
| H  | 2.192536  | -5.537728 | 5.174367  |
| H  | -2.092634 | -5.228608 | 5.544509  |
| H  | 0.082668  | 6.237245  | -6.282508 |
| H  | 0.082668  | 6.237245  | 6.282508  |
| H  | 0.061682  | -6.274481 | -6.239561 |
| H  | 0.061682  | -6.274481 | 6.239561  |
| N  | -2.233473 | 0.000936  | 0.000000  |
| H  | -2.603190 | 0.955210  | 0.000000  |
| H  | -2.597997 | -0.477765 | -0.827385 |
| H  | -2.597997 | -0.477765 | 0.827385  |
| Ag | 2.492203  | 0.000923  | 0.000000  |

**Table S20.** Optimized coordinates ( $\text{\AA}$ ) of the LS Au–CoTPP–NH<sub>3</sub> (C<sub>s</sub>) cluster at the SR-ZORA, BP86, TZP, spin-restricted level of theory.

|    |           |           |           |
|----|-----------|-----------|-----------|
| Co | -0.012744 | 0.010599  | 0.000000  |
| N  | -0.002107 | 0.006870  | -1.989800 |
| N  | -0.002107 | 0.006870  | 1.989800  |
| N  | 0.019791  | 1.994432  | 0.000000  |
| N  | -0.046701 | -1.980148 | 0.000000  |
| C  | 0.171788  | -5.463904 | 5.500194  |
| C  | 1.347595  | -4.991591 | 4.909871  |
| C  | 1.290300  | -4.012367 | 3.914635  |
| C  | 0.056164  | -3.490059 | 3.496112  |
| C  | -1.118347 | -3.971356 | 4.093992  |
| C  | -1.061890 | -4.952125 | 5.088464  |
| C  | 0.004548  | -2.431357 | 2.436053  |
| C  | 0.034259  | -1.093962 | 2.830512  |
| C  | 0.047696  | 1.104453  | 2.833096  |
| C  | 0.114065  | 0.683126  | 4.210504  |
| C  | 0.105527  | -0.677357 | 4.208820  |
| C  | 0.044399  | 2.442635  | 2.438426  |
| C  | 0.073711  | 3.502598  | 3.495156  |
| C  | 1.260006  | 4.198308  | 3.777000  |
| C  | 1.285064  | 5.191774  | 4.759236  |
| C  | 0.125191  | 5.503975  | 5.473447  |
| C  | -1.060860 | 4.816608  | 5.201261  |
| C  | -1.085307 | 3.822665  | 4.219532  |
| C  | 0.021458  | 2.836731  | -1.099787 |
| C  | -0.008361 | 4.216163  | -0.680089 |
| C  | -0.008361 | 4.216163  | 0.680089  |
| C  | 0.021458  | 2.836731  | 1.099787  |
| C  | 0.044399  | 2.442635  | -2.438426 |
| C  | 0.073711  | 3.502598  | -3.495156 |
| C  | 1.260006  | 4.198308  | -3.777000 |
| C  | 1.285064  | 5.191774  | -4.759236 |
| C  | 0.125191  | 5.503975  | -5.473447 |
| C  | -1.060860 | 4.816608  | -5.201261 |
| C  | -1.085307 | 3.822665  | -4.219532 |
| C  | -0.046550 | -2.823812 | -1.098527 |
| C  | -0.077662 | -4.203582 | -0.680064 |
| C  | -0.077662 | -4.203582 | 0.680064  |
| C  | -0.046550 | -2.823812 | 1.098527  |
| C  | 0.004548  | -2.431357 | -2.436053 |
| C  | 0.056164  | -3.490059 | -3.496112 |
| C  | 1.290300  | -4.012367 | -3.914635 |
| C  | 1.347595  | -4.991591 | -4.909871 |
| C  | 0.171788  | -5.463904 | -5.500194 |
| C  | -1.061890 | -4.952125 | -5.088464 |
| C  | -1.118347 | -3.971356 | -4.093992 |
| C  | 0.047696  | 1.104453  | -2.833096 |
| C  | 0.114065  | 0.683126  | -4.210504 |
| C  | 0.105527  | -0.677357 | -4.208820 |
| C  | 0.034259  | -1.093962 | -2.830512 |
| H  | -0.030001 | 5.065822  | -1.354189 |
| H  | -0.030001 | 5.065822  | 1.354189  |

---

|    |           |           |           |
|----|-----------|-----------|-----------|
| H  | -0.088339 | -5.052159 | -1.356393 |
| H  | -0.088339 | -5.052159 | 1.356393  |
| H  | 0.167787  | 1.355517  | -5.059759 |
| H  | 0.167787  | 1.355517  | 5.059759  |
| H  | 0.148288  | -1.353295 | -5.056319 |
| H  | 0.148288  | -1.353295 | 5.056319  |
| H  | 2.165518  | 3.951856  | -3.221125 |
| H  | -2.012055 | 3.287997  | -4.005859 |
| H  | 2.207417  | -3.642807 | -3.453762 |
| H  | -2.082636 | -3.571345 | -3.775652 |
| H  | 2.165518  | 3.951856  | 3.221125  |
| H  | -2.012055 | 3.287997  | 4.005859  |
| H  | 2.207417  | -3.642807 | 3.453762  |
| H  | -2.082636 | -3.571345 | 3.775652  |
| H  | 2.215208  | 5.722180  | -4.968510 |
| H  | -1.971430 | 5.055307  | -5.753300 |
| H  | 2.314752  | -5.386573 | -5.225311 |
| H  | -1.984722 | -5.316892 | -5.542912 |
| H  | 2.215208  | 5.722180  | 4.968510  |
| H  | -1.971430 | 5.055307  | 5.753300  |
| H  | 2.314752  | -5.386573 | 5.225311  |
| H  | -1.984722 | -5.316892 | 5.542912  |
| H  | 0.145777  | 6.280054  | -6.240104 |
| H  | 0.145777  | 6.280054  | 6.240104  |
| H  | 0.216881  | -6.228637 | -6.277066 |
| H  | 0.216881  | -6.228637 | 6.277066  |
| N  | -2.096528 | 0.038335  | 0.000000  |
| H  | -2.439256 | 1.003000  | 0.000000  |
| H  | -2.462055 | -0.434161 | -0.830782 |
| H  | -2.462055 | -0.434161 | 0.830782  |
| Au | 2.484464  | -0.035576 | 0.000000  |

**Table S21.** Optimized coordinates (Å) of the LS Cu–CoTPP–NO (C<sub>s</sub>) cluster at the SR-ZORA, BP86, TZP, spin-unrestricted level of theory.

|    |           |           |           |
|----|-----------|-----------|-----------|
| Co | 0.047100  | -0.048040 | 0.000000  |
| N  | 1.126926  | 0.852278  | 1.398941  |
| N  | -0.848054 | -1.117647 | -1.395579 |
| N  | 1.126926  | 0.852278  | -1.398941 |
| N  | -0.848054 | -1.117647 | 1.395579  |
| C  | 1.937107  | 1.960365  | 1.224447  |
| C  | 1.137268  | 0.600579  | 2.761520  |
| C  | -0.595846 | -1.127251 | -2.758567 |
| C  | -1.956755 | -1.929576 | -1.223311 |
| C  | 1.937107  | 1.960365  | -1.224447 |
| C  | 1.137268  | 0.600579  | -2.761520 |
| C  | -0.595846 | -1.127251 | 2.758567  |
| C  | -1.956755 | -1.929576 | 1.223311  |
| C  | 2.273480  | 2.541819  | 0.000000  |
| C  | 0.359752  | -0.353577 | -3.419908 |
| C  | 0.359752  | -0.353577 | 3.419908  |
| C  | -2.535406 | -2.272575 | 0.000000  |
| C  | 2.464065  | 2.401505  | 2.491778  |
| C  | -1.540659 | -1.978635 | -3.435801 |
| C  | 1.993517  | 1.542475  | 3.437708  |
| C  | -2.399324 | -2.451781 | -2.491118 |
| C  | 2.464065  | 2.401505  | -2.491778 |
| C  | 1.993517  | 1.542475  | -3.437708 |
| C  | -1.540659 | -1.978635 | 3.435801  |
| C  | -2.399324 | -2.451781 | 2.491118  |
| H  | 3.128618  | 3.249072  | 2.621828  |
| H  | 2.184406  | 1.545828  | 4.505746  |
| H  | -1.547184 | -2.162828 | -4.504863 |
| H  | -3.249087 | -3.113174 | -2.622088 |
| H  | 3.128618  | 3.249072  | -2.621828 |
| H  | -1.547184 | -2.162828 | 4.504863  |
| H  | 2.184406  | 1.545828  | -4.505746 |
| H  | -3.249087 | -3.113174 | 2.622088  |
| C  | 3.065162  | 3.813586  | 0.000000  |
| C  | 0.474516  | -0.473018 | 4.909570  |
| C  | 0.474516  | -0.473018 | -4.909570 |
| C  | -3.792088 | -3.089294 | 0.000000  |
| C  | 4.468181  | 3.804496  | 0.000000  |
| C  | 2.394594  | 5.047195  | 0.000000  |
| C  | 1.323313  | -1.427760 | -5.490101 |
| C  | -0.270369 | 0.371233  | -5.748890 |
| C  | 1.323313  | -1.427760 | 5.490101  |
| C  | -0.270369 | 0.371233  | 5.748890  |
| C  | -3.750122 | -4.492082 | 0.000000  |
| C  | -5.041209 | -2.448446 | 0.000000  |
| C  | 5.185351  | 5.004307  | 0.000000  |
| C  | 3.111859  | 6.246204  | 0.000000  |
| C  | 1.428442  | -1.533071 | -6.880290 |
| C  | -0.164349 | 0.266389  | -7.137934 |
| C  | 1.428442  | -1.533071 | 6.880290  |
| C  | -0.164349 | 0.266389  | 7.137934  |



---

|    |           |           |           |
|----|-----------|-----------|-----------|
| C  | -4.932368 | -5.237867 | 0.000000  |
| C  | -6.222718 | -3.194809 | 0.000000  |
| C  | 4.509283  | 6.227424  | 0.000000  |
| C  | 0.685794  | -0.685922 | 7.707364  |
| C  | 0.685794  | -0.685922 | -7.707364 |
| C  | -6.171208 | -4.591273 | 0.000000  |
| H  | 4.996227  | 2.849687  | 0.000000  |
| H  | 1.303688  | 5.060630  | 0.000000  |
| H  | 1.904792  | -2.088072 | -4.844615 |
| H  | -0.935186 | 1.113991  | -5.305193 |
| H  | 1.904792  | -2.088072 | 4.844615  |
| H  | -0.935186 | 1.113991  | 5.305193  |
| H  | -2.783425 | -4.997895 | 0.000000  |
| H  | -5.081016 | -1.358413 | 0.000000  |
| H  | 6.276089  | 4.982248  | 0.000000  |
| H  | 2.576189  | 7.196753  | 0.000000  |
| H  | 2.094353  | -2.278768 | -7.317160 |
| H  | -0.748866 | 0.929990  | -7.777346 |
| H  | 2.094353  | -2.278768 | 7.317160  |
| H  | -0.748866 | 0.929990  | 7.777346  |
| H  | -4.884095 | -6.327823 | 0.000000  |
| H  | -7.185961 | -2.682222 | 0.000000  |
| H  | 5.069785  | 7.163368  | 0.000000  |
| H  | 0.766436  | -0.767849 | 8.792274  |
| H  | 0.766436  | -0.767849 | -8.792274 |
| H  | -7.093512 | -5.174059 | 0.000000  |
| Cu | 1.753919  | -1.794877 | 0.000000  |
| N  | -1.246721 | 1.288298  | 0.000000  |
| O  | -2.413929 | 1.092305  | 0.000000  |

**Table S22.** Optimized coordinates (Å) of the LS Ag–CoTPP–NO (C<sub>s</sub>) cluster at the SR-ZORA, BP86, TZP, spin-unrestricted level of theory.

|    |           |           |           |
|----|-----------|-----------|-----------|
| Co | -0.002816 | -0.003172 | 0.000000  |
| N  | 1.086575  | 0.894853  | 1.397380  |
| N  | -0.888962 | -1.077644 | -1.393360 |
| N  | 1.086575  | 0.894853  | -1.397380 |
| N  | -0.888962 | -1.077644 | 1.393360  |
| C  | 1.900988  | 2.000504  | 1.224430  |
| C  | 1.106098  | 0.633650  | 2.757881  |
| C  | -0.626664 | -1.095209 | -2.754559 |
| C  | -1.993720 | -1.895586 | -1.223232 |
| C  | 1.900988  | 2.000504  | -1.224430 |
| C  | 1.106098  | 0.633650  | -2.757881 |
| C  | -0.626664 | -1.095209 | 2.754559  |
| C  | -1.993720 | -1.895586 | 1.223232  |
| C  | 2.245893  | 2.578007  | 0.000000  |
| C  | 0.338271  | -0.330551 | -3.412939 |
| C  | 0.338271  | -0.330551 | 3.412939  |
| C  | -2.568802 | -2.245534 | 0.000000  |
| C  | 2.433266  | 2.434375  | 2.492320  |
| C  | -1.562445 | -1.955699 | -3.433130 |
| C  | 1.966586  | 1.570253  | 3.435772  |
| C  | -2.425953 | -2.426375 | -2.491540 |
| C  | 2.433266  | 2.434375  | -2.492320 |
| C  | 1.966586  | 1.570253  | -3.435772 |
| C  | -1.562445 | -1.955699 | 3.433130  |
| C  | -2.425953 | -2.426375 | 2.491540  |
| H  | 3.099929  | 3.280114  | 2.624033  |
| H  | 2.163036  | 1.566392  | 4.502796  |
| H  | -1.558724 | -2.148715 | -4.500768 |
| H  | -3.270327 | -3.094260 | -2.624377 |
| H  | 3.099929  | 3.280114  | -2.624033 |
| H  | -1.558724 | -2.148715 | 4.500768  |
| H  | 2.163036  | 1.566392  | -4.502796 |
| H  | -3.270327 | -3.094260 | 2.624377  |
| C  | 3.080909  | 3.822911  | 0.000000  |
| C  | 0.500530  | -0.499146 | 4.893698  |
| C  | 0.500530  | -0.499146 | -4.893698 |
| C  | -3.807613 | -3.089566 | 0.000000  |
| C  | 4.483062  | 3.759579  | 0.000000  |
| C  | 2.460337  | 5.082084  | 0.000000  |
| C  | 1.412604  | -1.436499 | -5.402810 |
| C  | -0.252766 | 0.270983  | -5.793552 |
| C  | 1.412604  | -1.436499 | 5.402810  |
| C  | -0.252766 | 0.270983  | 5.793552  |
| C  | -3.730903 | -4.491112 | 0.000000  |
| C  | -5.072275 | -2.480491 | 0.000000  |
| C  | 5.247940  | 4.929570  | 0.000000  |
| C  | 3.224695  | 6.252179  | 0.000000  |
| C  | 1.570480  | -1.598155 | -6.782268 |
| C  | -0.095699 | 0.108427  | -7.172675 |
| C  | 1.570480  | -1.598155 | 6.782268  |
| C  | -0.095699 | 0.108427  | 7.172675  |

---

|    |           |           |           |
|----|-----------|-----------|-----------|
| C  | -4.893771 | -5.266664 | 0.000000  |
| C  | -6.234894 | -3.256327 | 0.000000  |
| C  | 4.620966  | 6.179600  | 0.000000  |
| C  | 0.816944  | -0.825799 | 7.670571  |
| C  | 0.816944  | -0.825799 | -7.670571 |
| C  | -6.149191 | -4.651036 | 0.000000  |
| H  | 4.973649  | 2.784983  | 0.000000  |
| H  | 1.370897  | 5.139102  | 0.000000  |
| H  | 1.999804  | -2.039825 | -4.709118 |
| H  | -0.964448 | 1.001240  | -5.405581 |
| H  | 1.999804  | -2.039825 | 4.709118  |
| H  | -0.964448 | 1.001240  | 5.405581  |
| H  | -2.751915 | -4.972770 | 0.000000  |
| H  | -5.139338 | -1.391828 | 0.000000  |
| H  | 6.337008  | 4.862839  | 0.000000  |
| H  | 2.726736  | 7.223000  | 0.000000  |
| H  | 2.284104  | -2.330383 | -7.163076 |
| H  | -0.687430 | 0.715529  | -7.859635 |
| H  | 2.284104  | -2.330383 | 7.163076  |
| H  | -0.687430 | 0.715529  | 7.859635  |
| H  | -4.817547 | -6.355140 | 0.000000  |
| H  | -7.210537 | -2.767918 | 0.000000  |
| H  | 5.217680  | 7.092753  | 0.000000  |
| H  | 0.940386  | -0.951498 | 8.747376  |
| H  | 0.940386  | -0.951498 | -8.747376 |
| H  | -7.056934 | -5.255970 | 0.000000  |
| Ag | 1.899028  | -1.934147 | 0.000000  |
| N  | -1.273973 | 1.332476  | 0.000000  |
| O  | -2.440123 | 1.130829  | 0.000000  |

**Table S23.** Optimized coordinates (Å) of the LS Au–CoTPP–NO (C<sub>s</sub>) cluster at the SR-ZORA, BP86, TZP, spin-unrestricted level of theory.

|    |           |           |           |
|----|-----------|-----------|-----------|
| Co | 0.047938  | -0.037912 | 0.000000  |
| N  | 1.104568  | 0.884787  | 1.394744  |
| N  | -0.852622 | -1.104130 | -1.393685 |
| N  | 1.104568  | 0.884787  | -1.394744 |
| N  | -0.852622 | -1.104130 | 1.393685  |
| C  | 1.888493  | 2.010790  | 1.224072  |
| C  | 1.150359  | 0.599494  | 2.749156  |
| C  | -0.567309 | -1.145076 | -2.747238 |
| C  | -1.972115 | -1.897863 | -1.223942 |
| C  | 1.888493  | 2.010790  | -1.224072 |
| C  | 1.150359  | 0.599494  | -2.749156 |
| C  | -0.567309 | -1.145076 | 2.747238  |
| C  | -1.972115 | -1.897863 | 1.223942  |
| C  | 2.211134  | 2.602748  | 0.000000  |
| C  | 0.407991  | -0.387826 | -3.400540 |
| C  | 0.407991  | -0.387826 | 3.400540  |
| C  | -2.562162 | -2.224716 | 0.000000  |
| C  | 2.424162  | 2.441261  | 2.491934  |
| C  | -1.507537 | -2.000994 | -3.426217 |
| C  | 1.997615  | 1.547936  | 3.427521  |
| C  | -2.396585 | -2.437751 | -2.491349 |
| C  | 2.424162  | 2.441261  | -2.491934 |
| C  | 1.997615  | 1.547936  | -3.427521 |
| C  | -1.507537 | -2.000994 | 3.426217  |
| C  | -2.396585 | -2.437751 | 2.491349  |
| H  | 3.069298  | 3.302914  | 2.627578  |
| H  | 2.211762  | 1.531523  | 4.491145  |
| H  | -1.491684 | -2.211089 | -4.490579 |
| H  | -3.252293 | -3.090334 | -2.627856 |
| H  | 3.069298  | 3.302914  | -2.627578 |
| H  | -1.491684 | -2.211089 | 4.490579  |
| H  | 2.211762  | 1.531523  | -4.491145 |
| H  | -3.252293 | -3.090334 | 2.627856  |
| C  | 3.006739  | 3.872770  | 0.000000  |
| C  | 0.604261  | -0.588749 | 4.872517  |
| C  | 0.604261  | -0.588749 | -4.872517 |
| C  | -3.829817 | -3.024558 | 0.000000  |
| C  | 4.410231  | 3.853252  | 0.000000  |
| C  | 2.346421  | 5.111536  | 0.000000  |
| C  | 1.490319  | -1.573672 | -5.335346 |
| C  | -0.091267 | 0.192601  | -5.808720 |
| C  | 1.490319  | -1.573672 | 5.335346  |
| C  | -0.091267 | 0.192601  | 5.808720  |
| C  | -3.807091 | -4.428105 | 0.000000  |
| C  | -5.069908 | -2.366638 | 0.000000  |
| C  | 5.137315  | 5.047043  | 0.000000  |
| C  | 3.073316  | 6.305197  | 0.000000  |
| C  | 1.680135  | -1.770613 | -6.706018 |
| C  | 0.098031  | -0.005650 | -7.179072 |
| C  | 1.680135  | -1.770613 | 6.706018  |
| C  | 0.098031  | -0.005650 | 7.179072  |

---

|    |           |           |           |
|----|-----------|-----------|-----------|
| C  | -4.999541 | -5.157462 | 0.000000  |
| C  | -6.261900 | -3.096330 | 0.000000  |
| C  | 4.471123  | 6.276380  | 0.000000  |
| C  | 0.984611  | -0.987332 | 7.631080  |
| C  | 0.984611  | -0.987332 | -7.631080 |
| C  | -6.230206 | -4.493539 | 0.000000  |
| H  | 4.931020  | 2.894577  | 0.000000  |
| H  | 1.255724  | 5.134393  | 0.000000  |
| H  | 2.032810  | -2.184457 | -4.612283 |
| H  | -0.785346 | 0.957226  | -5.456526 |
| H  | 2.032810  | -2.184457 | 4.612283  |
| H  | -0.785346 | 0.957226  | 5.456526  |
| H  | -2.847495 | -4.947172 | 0.000000  |
| H  | -5.094751 | -1.276150 | 0.000000  |
| H  | 6.228100  | 5.015275  | 0.000000  |
| H  | 2.544895  | 7.259711  | 0.000000  |
| H  | 2.373713  | -2.539156 | -7.050921 |
| H  | -0.448813 | 0.608337  | -7.896513 |
| H  | 2.373713  | -2.539156 | 7.050921  |
| H  | -0.448813 | 0.608337  | 7.896513  |
| H  | -4.965799 | -6.248138 | 0.000000  |
| H  | -7.217737 | -2.570083 | 0.000000  |
| H  | 5.039075  | 7.207929  | 0.000000  |
| H  | 1.131940  | -1.140296 | 8.701257  |
| H  | 1.131940  | -1.140296 | -8.701257 |
| H  | -7.160715 | -5.063160 | 0.000000  |
| Au | 1.870466  | -1.911491 | 0.000000  |
| N  | -1.275848 | 1.244597  | 0.000000  |
| O  | -2.439789 | 1.049564  | 0.000000  |

**Table S24.** Optimized coordinates (Å) of the LS Cu–CoTPP–NO<sub>2</sub> (C<sub>2v</sub>) cluster at the SR-ZORA, BP86, TZP, spin-unrestricted level of theory.

|    |           |           |           |
|----|-----------|-----------|-----------|
| Co | 0.000000  | 0.000000  | -0.003873 |
| N  | 1.388254  | 1.395112  | 0.137846  |
| N  | -1.388254 | -1.395112 | 0.137846  |
| N  | 1.388254  | -1.395112 | 0.137846  |
| N  | -1.388254 | 1.395112  | 0.137846  |
| C  | 2.751970  | 1.222626  | -0.040539 |
| C  | 1.221569  | 2.761233  | 0.325678  |
| C  | -1.221569 | -2.761233 | 0.325678  |
| C  | -2.751970 | -1.222626 | -0.040539 |
| C  | 2.751970  | -1.222626 | -0.040539 |
| C  | 1.221569  | -2.761233 | 0.325678  |
| C  | -1.221569 | 2.761233  | 0.325678  |
| C  | -2.751970 | 1.222626  | -0.040539 |
| C  | 3.405998  | 0.000000  | -0.187079 |
| C  | 0.000000  | -3.420926 | 0.455979  |
| C  | 0.000000  | 3.420926  | 0.455979  |
| C  | -3.405998 | 0.000000  | -0.187079 |
| C  | 3.437249  | 2.486902  | 0.037339  |
| C  | -2.493586 | -3.435188 | 0.289340  |
| C  | 2.493586  | 3.435188  | 0.289340  |
| C  | -3.437249 | -2.486902 | 0.037339  |
| C  | 3.437249  | -2.486902 | 0.037339  |
| C  | 2.493586  | -3.435188 | 0.289340  |
| C  | -2.493586 | 3.435188  | 0.289340  |
| C  | -3.437249 | 2.486902  | 0.037339  |
| H  | 4.509196  | 2.613481  | -0.070240 |
| H  | 2.628773  | 4.503133  | 0.424194  |
| H  | -2.628773 | -4.503133 | 0.424194  |
| H  | -4.509196 | -2.613481 | -0.070240 |
| H  | 4.509196  | -2.613481 | -0.070240 |
| H  | -2.628773 | 4.503133  | 0.424194  |
| H  | 2.628773  | -4.503133 | 0.424194  |
| H  | -4.509196 | 2.613481  | -0.070240 |
| C  | 4.879437  | 0.000000  | -0.456593 |
| C  | 0.000000  | 4.903337  | 0.675325  |
| C  | 0.000000  | -4.903337 | 0.675325  |
| C  | -4.879437 | 0.000000  | -0.456593 |
| C  | 5.810866  | 0.000000  | 0.592865  |
| C  | 5.344761  | 0.000000  | -1.780951 |
| C  | 0.000000  | -5.428008 | 1.976932  |
| C  | 0.000000  | -5.788737 | -0.413520 |
| C  | 0.000000  | 5.428008  | 1.976932  |
| C  | 0.000000  | 5.788737  | -0.413520 |
| C  | -5.810866 | 0.000000  | 0.592865  |
| C  | -5.344761 | 0.000000  | -1.780951 |
| C  | 7.182324  | 0.000000  | 0.323478  |
| C  | 6.716714  | 0.000000  | -2.048378 |
| C  | 0.000000  | -6.810052 | 2.185090  |
| C  | 0.000000  | -7.170444 | -0.204408 |
| C  | 0.000000  | 6.810052  | 2.185090  |
| C  | 0.000000  | 7.170444  | -0.204408 |

---

|    |           |           |           |
|----|-----------|-----------|-----------|
| C  | -7.182324 | 0.000000  | 0.323478  |
| C  | -6.716714 | 0.000000  | -2.048378 |
| C  | 7.638177  | 0.000000  | -0.997644 |
| C  | 0.000000  | 7.684365  | 1.095150  |
| C  | 0.000000  | -7.684365 | 1.095150  |
| C  | -7.638177 | 0.000000  | -0.997644 |
| H  | 5.455344  | 0.000000  | 1.624539  |
| H  | 4.622915  | 0.000000  | -2.598665 |
| H  | 0.000000  | -4.746574 | 2.829088  |
| H  | 0.000000  | -5.387192 | -1.427942 |
| H  | 0.000000  | 4.746574  | 2.829088  |
| H  | 0.000000  | 5.387192  | -1.427942 |
| H  | -5.455344 | 0.000000  | 1.624539  |
| H  | -4.622915 | 0.000000  | -2.598665 |
| H  | 7.895672  | 0.000000  | 1.149066  |
| H  | 7.065171  | 0.000000  | -3.082340 |
| H  | 0.000000  | -7.203493 | 3.202738  |
| H  | 0.000000  | -7.846799 | -1.060472 |
| H  | 0.000000  | 7.203493  | 3.202738  |
| H  | 0.000000  | 7.846799  | -1.060472 |
| H  | -7.895672 | 0.000000  | 1.149066  |
| H  | -7.065171 | 0.000000  | -3.082340 |
| H  | 8.708841  | 0.000000  | -1.207320 |
| H  | 0.000000  | 8.763160  | 1.257670  |
| H  | 0.000000  | -8.763160 | 1.257670  |
| H  | -8.708841 | 0.000000  | -1.207320 |
| Cu | 0.000000  | 0.000000  | 2.351666  |
| N  | 0.000000  | 0.000000  | -1.975007 |
| O  | -1.094196 | 0.000000  | -2.554599 |
| O  | 1.094196  | 0.000000  | -2.554599 |

**Table S25.** Optimized coordinates (Å) of the LS Ag–CoTPP–NO<sub>2</sub> (C<sub>2v</sub>) cluster at the SR-ZORA, BP86, TZP, spin-unrestricted level of theory.

|    |           |           |           |
|----|-----------|-----------|-----------|
| Co | 0.000000  | 0.000000  | 0.039406  |
| N  | 1.388130  | 1.393318  | 0.176099  |
| N  | -1.388130 | -1.393318 | 0.176099  |
| N  | 1.388130  | -1.393318 | 0.176099  |
| N  | -1.388130 | 1.393318  | 0.176099  |
| C  | 2.748248  | 1.222452  | -0.028200 |
| C  | 1.221523  | 2.758971  | 0.366231  |
| C  | -1.221523 | -2.758971 | 0.366231  |
| C  | -2.748248 | -1.222452 | -0.028200 |
| C  | 2.748248  | -1.222452 | -0.028200 |
| C  | 1.221523  | -2.758971 | 0.366231  |
| C  | -1.221523 | 2.758971  | 0.366231  |
| C  | -2.748248 | 1.222452  | -0.028200 |
| C  | 3.399466  | 0.000000  | -0.193177 |
| C  | 0.000000  | -3.418430 | 0.499323  |
| C  | 0.000000  | 3.418430  | 0.499323  |
| C  | -3.399466 | 0.000000  | -0.193177 |
| C  | 3.432284  | 2.487882  | 0.037030  |
| C  | -2.492355 | -3.433927 | 0.310777  |
| C  | 2.492355  | 3.433927  | 0.310777  |
| C  | -3.432284 | -2.487882 | 0.037030  |
| C  | 3.432284  | -2.487882 | 0.037030  |
| C  | 2.492355  | -3.433927 | 0.310777  |
| C  | -2.492355 | 3.433927  | 0.310777  |
| C  | -3.432284 | 2.487882  | 0.037030  |
| H  | 4.501374  | 2.616888  | -0.093347 |
| H  | 2.628669  | 4.501938  | 0.443610  |
| H  | -2.628669 | -4.501938 | 0.443610  |
| H  | -4.501374 | -2.616888 | -0.093347 |
| H  | 4.501374  | -2.616888 | -0.093347 |
| H  | -2.628669 | 4.501938  | 0.443610  |
| H  | 2.628669  | -4.501938 | 0.443610  |
| H  | -4.501374 | 2.616888  | -0.093347 |
| C  | 4.861567  | 0.000000  | -0.518878 |
| C  | 0.000000  | 4.904241  | 0.697362  |
| C  | 0.000000  | -4.904241 | 0.697362  |
| C  | -4.861567 | 0.000000  | -0.518878 |
| C  | 5.838908  | 0.000000  | 0.487683  |
| C  | 5.267944  | 0.000000  | -1.862732 |
| C  | 0.000000  | -5.452200 | 1.989133  |
| C  | 0.000000  | -5.770975 | -0.406865 |
| C  | 0.000000  | 5.452200  | 1.989133  |
| C  | 0.000000  | 5.770975  | -0.406865 |
| C  | -5.838908 | 0.000000  | 0.487683  |
| C  | -5.267944 | 0.000000  | -1.862732 |
| C  | 7.197121  | 0.000000  | 0.157314  |
| C  | 6.626043  | 0.000000  | -2.191573 |
| C  | 0.000000  | -6.838090 | 2.172880  |
| C  | 0.000000  | -7.156203 | -0.223056 |
| C  | 0.000000  | 6.838090  | 2.172880  |
| C  | 0.000000  | 7.156203  | -0.223056 |



---

|    |           |           |           |
|----|-----------|-----------|-----------|
| C  | -7.197121 | 0.000000  | 0.157314  |
| C  | -6.626043 | 0.000000  | -2.191573 |
| C  | 7.594102  | 0.000000  | -1.183424 |
| C  | 0.000000  | 7.693654  | 1.068008  |
| C  | 0.000000  | -7.693654 | 1.068008  |
| C  | -7.594102 | 0.000000  | -1.183424 |
| H  | 5.530265  | 0.000000  | 1.534269  |
| H  | 4.509832  | 0.000000  | -2.646875 |
| H  | 0.000000  | -4.785718 | 2.852843  |
| H  | 0.000000  | -5.351866 | -1.414129 |
| H  | 0.000000  | 4.785718  | 2.852843  |
| H  | 0.000000  | 5.351866  | -1.414129 |
| H  | -5.530265 | 0.000000  | 1.534269  |
| H  | -4.509832 | 0.000000  | -2.646875 |
| H  | 7.946462  | 0.000000  | 0.950451  |
| H  | 6.927581  | 0.000000  | -3.240146 |
| H  | 0.000000  | -7.249752 | 3.183356  |
| H  | 0.000000  | -7.816256 | -1.091751 |
| H  | 0.000000  | 7.249752  | 3.183356  |
| H  | 0.000000  | 7.816256  | -1.091751 |
| H  | -7.946462 | 0.000000  | 0.950451  |
| H  | -6.927581 | 0.000000  | -3.240146 |
| H  | 8.654109  | 0.000000  | -1.441339 |
| H  | 0.000000  | 8.774951  | 1.212215  |
| H  | 0.000000  | -8.774951 | 1.212215  |
| H  | -8.654109 | 0.000000  | -1.441339 |
| Ag | 0.000000  | 0.000000  | 2.641294  |
| N  | 0.000000  | 0.000000  | -1.910308 |
| O  | -1.094088 | 0.000000  | -2.488689 |
| O  | 1.094088  | 0.000000  | -2.488689 |

**Table S26.** Optimized coordinates (Å) of the LS Au–CoTPP–NO<sub>2</sub> (C<sub>2v</sub>) cluster at the SR-ZORA, BP86, TZP, spin-unrestricted level of theory.

|    |           |           |           |
|----|-----------|-----------|-----------|
| Co | 0.000000  | 0.000000  | 0.084855  |
| N  | -1.392941 | 1.387005  | 0.195781  |
| N  | 1.392941  | -1.387005 | 0.195781  |
| N  | 1.392941  | 1.387005  | 0.195781  |
| N  | -1.392941 | -1.387005 | 0.195781  |
| C  | -1.223675 | 2.741653  | -0.029630 |
| C  | -2.752510 | 1.222470  | 0.416037  |
| C  | 2.752510  | -1.222470 | 0.416037  |
| C  | 1.223675  | -2.741653 | -0.029630 |
| C  | 1.223675  | 2.741653  | -0.029630 |
| C  | 2.752510  | 1.222470  | 0.416037  |
| C  | -2.752510 | -1.222470 | 0.416037  |
| C  | -1.223675 | -2.741653 | -0.029630 |
| C  | 0.000000  | 3.387776  | -0.212237 |
| C  | 3.407408  | 0.000000  | 0.567925  |
| C  | -3.407408 | 0.000000  | 0.567925  |
| C  | 0.000000  | -3.387776 | -0.212237 |
| C  | -2.487669 | 3.428215  | 0.048124  |
| C  | 3.428164  | -2.493049 | 0.357169  |
| C  | -3.428164 | 2.493049  | 0.357169  |
| C  | 2.487669  | -3.428215 | 0.048124  |
| C  | 2.487669  | 3.428215  | 0.048124  |
| C  | 3.428164  | 2.493049  | 0.357169  |
| C  | -3.428164 | -2.493049 | 0.357169  |
| C  | -2.487669 | -3.428215 | 0.048124  |
| H  | -2.618567 | 4.495445  | -0.095197 |
| H  | -4.492893 | 2.631839  | 0.511348  |
| H  | 4.492893  | -2.631839 | 0.511348  |
| H  | 2.618567  | -4.495445 | -0.095197 |
| H  | 2.618567  | 4.495445  | -0.095197 |
| H  | -4.492893 | -2.631839 | 0.511348  |
| H  | 4.492893  | 2.631839  | 0.511348  |
| H  | -2.618567 | -4.495445 | -0.095197 |
| C  | 0.000000  | 4.844052  | -0.560709 |
| C  | -4.882201 | 0.000000  | 0.830611  |
| C  | 4.882201  | 0.000000  | 0.830611  |
| C  | 0.000000  | -4.844052 | -0.560709 |
| C  | 0.000000  | 5.836492  | 0.430959  |
| C  | 0.000000  | 5.227654  | -1.911242 |
| C  | 5.362342  | 0.000000  | 2.149337  |
| C  | 5.802807  | 0.000000  | -0.228494 |
| C  | -5.362342 | 0.000000  | 2.149337  |
| C  | -5.802807 | 0.000000  | -0.228494 |
| C  | 0.000000  | -5.836492 | 0.430959  |
| C  | 0.000000  | -5.227654 | -1.911242 |
| C  | 0.000000  | 7.189055  | 0.078260  |
| C  | 0.000000  | 6.580221  | -2.261829 |
| C  | 6.736882  | 0.000000  | 2.402977  |
| C  | 7.176749  | 0.000000  | 0.026259  |
| C  | -6.736882 | 0.000000  | 2.402977  |
| C  | -7.176749 | 0.000000  | 0.026259  |

---

|    |           |           |           |
|----|-----------|-----------|-----------|
| C  | 0.000000  | -7.189055 | 0.078260  |
| C  | 0.000000  | -6.580221 | -2.261829 |
| C  | 0.000000  | 7.564397  | -1.268695 |
| C  | -7.647347 | 0.000000  | 1.342832  |
| C  | 7.647347  | 0.000000  | 1.342832  |
| C  | 0.000000  | -7.564397 | -1.268695 |
| H  | 0.000000  | 5.544271  | 1.482112  |
| H  | 0.000000  | 4.457113  | -2.683163 |
| H  | 4.652001  | 0.000000  | 2.977145  |
| H  | 5.436057  | 0.000000  | -1.255971 |
| H  | -4.652001 | 0.000000  | 2.977145  |
| H  | -5.436057 | 0.000000  | -1.255971 |
| H  | 0.000000  | -5.544271 | 1.482112  |
| H  | 0.000000  | -4.457113 | -2.683163 |
| H  | 0.000000  | 7.951122  | 0.859191  |
| H  | 0.000000  | 6.864610  | -3.315123 |
| H  | 7.096255  | 0.000000  | 3.433127  |
| H  | 7.880686  | 0.000000  | -0.807491 |
| H  | -7.096255 | 0.000000  | 3.433127  |
| H  | -7.880686 | 0.000000  | -0.807491 |
| H  | 0.000000  | -7.951122 | 0.859191  |
| H  | 0.000000  | -6.864610 | -3.315123 |
| H  | 0.000000  | 8.620257  | -1.543216 |
| H  | -8.719993 | 0.000000  | 1.541761  |
| H  | 8.719993  | 0.000000  | 1.541761  |
| H  | 0.000000  | -8.620257 | -1.543216 |
| Au | 0.000000  | 0.000000  | 2.642474  |
| N  | 0.000000  | 0.000000  | -1.866562 |
| O  | 0.000000  | -1.093480 | -2.445608 |
| O  | 0.000000  | 1.093480  | -2.445608 |

**Table S27.** Optimized coordinates (Å) of the high spin (HS) Cu–CoTPP–O<sub>2</sub> (C<sub>s</sub>) cluster at the SR-ZORA, BP86, TZP, spin-unrestricted level of theory.

|    |           |           |           |
|----|-----------|-----------|-----------|
| Co | 0.061713  | -0.071390 | 0.000000  |
| N  | 1.072846  | 0.881547  | 1.389910  |
| N  | -0.843638 | -1.125220 | -1.389732 |
| N  | 1.072846  | 0.881547  | -1.389910 |
| N  | -0.843638 | -1.125220 | 1.389732  |
| C  | 1.861696  | 2.009445  | 1.222374  |
| C  | 1.106404  | 0.616759  | 2.752279  |
| C  | -0.578456 | -1.153821 | -2.750923 |
| C  | -1.961342 | -1.925534 | -1.222125 |
| C  | 1.861696  | 2.009445  | -1.222374 |
| C  | 1.106404  | 0.616759  | -2.752279 |
| C  | -0.578456 | -1.153821 | 2.750923  |
| C  | -1.961342 | -1.925534 | 1.222125  |
| C  | 2.195173  | 2.594096  | 0.000000  |
| C  | 0.372685  | -0.372906 | -3.408355 |
| C  | 0.372685  | -0.372906 | 3.408355  |
| C  | -2.549938 | -2.255163 | 0.000000  |
| C  | 2.381800  | 2.454873  | 2.489822  |
| C  | -1.521853 | -2.005310 | -3.429410 |
| C  | 1.942143  | 1.574405  | 3.430519  |
| C  | -2.397363 | -2.455722 | -2.488879 |
| C  | 2.381800  | 2.454873  | -2.489822 |
| C  | 1.942143  | 1.574405  | -3.430519 |
| C  | -1.521853 | -2.005310 | 3.429410  |
| C  | -2.397363 | -2.455722 | 2.488879  |
| H  | 3.022636  | 3.319813  | 2.623421  |
| H  | 2.140461  | 1.573722  | 4.497157  |
| H  | -1.521839 | -2.197161 | -4.497236 |
| H  | -3.257798 | -3.102660 | -2.622462 |
| H  | 3.022636  | 3.319813  | -2.623421 |
| H  | -1.521839 | -2.197161 | 4.497236  |
| H  | 2.140461  | 1.573722  | -4.497157 |
| H  | -3.257798 | -3.102660 | 2.622462  |
| C  | 3.008067  | 3.852258  | 0.000000  |
| C  | 0.541586  | -0.530448 | 4.889058  |
| C  | 0.541586  | -0.530448 | -4.889058 |
| C  | -3.822660 | -3.045435 | 0.000000  |
| C  | 4.410634  | 3.807061  | 0.000000  |
| C  | 2.369753  | 5.102303  | 0.000000  |
| C  | 1.398239  | -1.514611 | -5.405377 |
| C  | -0.143347 | 0.308347  | -5.782742 |
| C  | 1.398239  | -1.514611 | 5.405377  |
| C  | -0.143347 | 0.308347  | 5.782742  |
| C  | -3.813080 | -4.448620 | 0.000000  |
| C  | -5.056223 | -2.374803 | 0.000000  |
| C  | 5.159292  | 4.987171  | 0.000000  |
| C  | 3.119054  | 6.282065  | 0.000000  |
| C  | 1.571212  | -1.654353 | -6.785582 |
| C  | 0.028863  | 0.167827  | -7.162136 |
| C  | 1.571212  | -1.654353 | 6.785582  |
| C  | 0.028863  | 0.167827  | 7.162136  |

---

|    |           |           |           |
|----|-----------|-----------|-----------|
| C  | -5.012596 | -5.166545 | 0.000000  |
| C  | -6.254498 | -3.093635 | 0.000000  |
| C  | 4.515241  | 6.227434  | 0.000000  |
| C  | 0.887476  | -0.812539 | 7.667177  |
| C  | 0.887476  | -0.812539 | -7.667177 |
| C  | -6.235928 | -4.490860 | 0.000000  |
| H  | 4.914025  | 2.839075  | 0.000000  |
| H  | 1.279664  | 5.144708  | 0.000000  |
| H  | 1.933921  | -2.170801 | -4.717346 |
| H  | -0.812618 | 1.075005  | -5.388964 |
| H  | 1.933921  | -2.170801 | 4.717346  |
| H  | -0.812618 | 1.075005  | 5.388964  |
| H  | -2.858715 | -4.977414 | 0.000000  |
| H  | -5.068234 | -1.284150 | 0.000000  |
| H  | 6.249231  | 4.936102  | 0.000000  |
| H  | 2.608515  | 7.246308  | 0.000000  |
| H  | 2.243217  | -2.422392 | -7.171351 |
| H  | -0.510844 | 0.826339  | -7.844763 |
| H  | 2.243217  | -2.422392 | 7.171351  |
| H  | -0.510844 | 0.826339  | 7.844763  |
| H  | -4.990168 | -6.257413 | 0.000000  |
| H  | -7.205335 | -2.558444 | 0.000000  |
| H  | 5.100178  | 7.148299  | 0.000000  |
| H  | 1.021544  | -0.919870 | 8.744799  |
| H  | 1.021544  | -0.919870 | -8.744799 |
| H  | -7.171706 | -5.051824 | 0.000000  |
| Cu | 1.696250  | -1.715367 | 0.000000  |
| O  | -1.373899 | 1.345554  | 0.000000  |
| O  | -2.618434 | 1.053211  | 0.000000  |

**Table S28.** Optimized coordinates (Å) of the HS Ag–CoTPP–O<sub>2</sub> (C<sub>s</sub>) cluster at the SR-ZORA, BP86, TZP, spin-unrestricted level of theory.

|    |           |           |           |
|----|-----------|-----------|-----------|
| Co | 0.029751  | -0.037609 | 0.000000  |
| N  | 1.052582  | 0.908182  | 1.390836  |
| N  | -0.872009 | -1.096478 | -1.390113 |
| N  | 1.052582  | 0.908182  | -1.390836 |
| N  | -0.872009 | -1.096478 | 1.390113  |
| C  | 1.847054  | 2.031860  | 1.222930  |
| C  | 1.083046  | 0.644282  | 2.753167  |
| C  | -0.607131 | -1.122860 | -2.751247 |
| C  | -1.984540 | -1.904357 | -1.222415 |
| C  | 1.847054  | 2.031860  | -1.222930 |
| C  | 1.083046  | 0.644282  | -2.753167 |
| C  | -0.607131 | -1.122860 | 2.751247  |
| C  | -1.984540 | -1.904357 | 1.222415  |
| C  | 2.186060  | 2.612952  | 0.000000  |
| C  | 0.345948  | -0.343539 | -3.408219 |
| C  | 0.345948  | -0.343539 | 3.408219  |
| C  | -2.569598 | -2.239175 | 0.000000  |
| C  | 2.365533  | 2.477548  | 2.491536  |
| C  | -1.545221 | -1.980790 | -3.429953 |
| C  | 1.919686  | 1.600336  | 3.432500  |
| C  | -2.417787 | -2.436703 | -2.489473 |
| C  | 2.365533  | 2.477548  | -2.491536 |
| C  | 1.919686  | 1.600336  | -3.432500 |
| C  | -1.545221 | -1.980790 | 3.429953  |
| C  | -2.417787 | -2.436703 | 2.489473  |
| H  | 3.007386  | 3.341888  | 2.626109  |
| H  | 2.113261  | 1.600847  | 4.500028  |
| H  | -1.543250 | -2.174093 | -4.497497 |
| H  | -3.272789 | -3.090685 | -2.623451 |
| H  | 3.007386  | 3.341888  | -2.626109 |
| H  | -1.543250 | -2.174093 | 4.497497  |
| H  | 2.113261  | 1.600847  | -4.500028 |
| H  | -3.272789 | -3.090685 | 2.623451  |
| C  | 3.010939  | 3.863781  | 0.000000  |
| C  | 0.514503  | -0.510797 | 4.887665  |
| C  | 0.514503  | -0.510797 | -4.887665 |
| C  | -3.836828 | -3.038168 | 0.000000  |
| C  | 4.413138  | 3.805161  | 0.000000  |
| C  | 2.385139  | 5.120210  | 0.000000  |
| C  | 1.397661  | -1.475177 | -5.396882 |
| C  | -0.211105 | 0.285779  | -5.787329 |
| C  | 1.397661  | -1.475177 | 5.396882  |
| C  | -0.211105 | 0.285779  | 5.787329  |
| C  | -3.819449 | -4.441330 | 0.000000  |
| C  | -5.073952 | -2.374380 | 0.000000  |
| C  | 5.173774  | 4.977575  | 0.000000  |
| C  | 3.145952  | 6.292686  | 0.000000  |
| C  | 1.556808  | -1.636404 | -6.776179 |
| C  | -0.053826 | 0.123176  | -7.166077 |
| C  | 1.556808  | -1.636404 | 6.776179  |
| C  | -0.053826 | 0.123176  | 7.166077  |

---

|    |           |           |           |
|----|-----------|-----------|-----------|
| C  | -5.014912 | -5.165809 | 0.000000  |
| C  | -6.268377 | -3.099557 | 0.000000  |
| C  | 4.541636  | 6.224856  | 0.000000  |
| C  | 0.831769  | -0.836877 | 7.664151  |
| C  | 0.831769  | -0.836877 | -7.664151 |
| C  | -6.242011 | -4.496847 | 0.000000  |
| H  | 4.907103  | 2.832317  | 0.000000  |
| H  | 1.295546  | 5.173179  | 0.000000  |
| H  | 1.963434  | -2.099732 | -4.703707 |
| H  | -0.903376 | 1.034265  | -5.398780 |
| H  | 1.963434  | -2.099732 | 4.703707  |
| H  | -0.903376 | 1.034265  | 5.398780  |
| H  | -2.862176 | -4.964977 | 0.000000  |
| H  | -5.091612 | -1.283892 | 0.000000  |
| H  | 6.263082  | 4.915407  | 0.000000  |
| H  | 2.644991  | 7.261934  | 0.000000  |
| H  | 2.248856  | -2.388892 | -7.157277 |
| H  | -0.626611 | 0.747898  | -7.853336 |
| H  | 2.248856  | -2.388892 | 7.157277  |
| H  | -0.626611 | 0.747898  | 7.853336  |
| H  | -4.986402 | -6.256570 | 0.000000  |
| H  | -7.222174 | -2.569820 | 0.000000  |
| H  | 5.134910  | 7.140247  | 0.000000  |
| H  | 0.955122  | -0.962060 | 8.740951  |
| H  | 0.955122  | -0.962060 | -8.740951 |
| H  | -7.174545 | -5.062858 | 0.000000  |
| Ag | 1.828158  | -1.840807 | 0.000000  |
| O  | -1.364002 | 1.379624  | 0.000000  |
| O  | -2.611568 | 1.093454  | 0.000000  |

**Table S29.** Optimized coordinates (Å) of the HS Au–CoTPP–O<sub>2</sub> (C<sub>s</sub>) cluster at the SR-ZORA, BP86, TZP, spin-unrestricted level of theory.

|    |           |           |           |
|----|-----------|-----------|-----------|
| Co | 0.028981  | -0.044716 | 0.000000  |
| N  | 1.036642  | 0.909186  | 1.388431  |
| N  | -0.909250 | -1.063316 | -1.390610 |
| N  | 1.036642  | 0.909186  | -1.388431 |
| N  | -0.909250 | -1.063316 | 1.390610  |
| C  | 1.805298  | 2.048624  | 1.223477  |
| C  | 1.096663  | 0.618420  | 2.742954  |
| C  | -0.620283 | -1.121635 | -2.743610 |
| C  | -2.049073 | -1.826732 | -1.224111 |
| C  | 1.805298  | 2.048624  | -1.223477 |
| C  | 1.096663  | 0.618420  | -2.742954 |
| C  | -0.620283 | -1.121635 | 2.743610  |
| C  | -2.049073 | -1.826732 | 1.224111  |
| C  | 2.120546  | 2.644808  | 0.000000  |
| C  | 0.365804  | -0.377337 | -3.394018 |
| C  | 0.365804  | -0.377337 | 3.394018  |
| C  | -2.650344 | -2.132817 | 0.000000  |
| C  | 2.339153  | 2.481293  | 2.490754  |
| C  | -1.575640 | -1.960530 | -3.422686 |
| C  | 1.931409  | 1.576133  | 3.423037  |
| C  | -2.481462 | -2.365547 | -2.489627 |
| C  | 2.339153  | 2.481293  | -2.490754 |
| C  | 1.931409  | 1.576133  | -3.423037 |
| C  | -1.575640 | -1.960530 | 3.422686  |
| C  | -2.481462 | -2.365547 | 2.489627  |
| H  | 2.967852  | 3.354407  | 2.629193  |
| H  | 2.146545  | 1.560719  | 4.486214  |
| H  | -1.560348 | -2.176934 | -4.485699 |
| H  | -3.356167 | -2.992552 | -2.626381 |
| H  | 2.967852  | 3.354407  | -2.629193 |
| H  | -1.560348 | -2.176934 | 4.485699  |
| H  | 2.146545  | 1.560719  | -4.486214 |
| H  | -3.356167 | -2.992552 | 2.626381  |
| C  | 2.903761  | 3.921752  | 0.000000  |
| C  | 0.585031  | -0.594121 | 4.859919  |
| C  | 0.585031  | -0.594121 | -4.859919 |
| C  | -3.934312 | -2.904536 | 0.000000  |
| C  | 4.307335  | 3.913938  | 0.000000  |
| C  | 2.231470  | 5.153894  | 0.000000  |
| C  | 1.549652  | -1.516459 | -5.293993 |
| C  | -0.160965 | 0.110075  | -5.818000 |
| C  | 1.549652  | -1.516459 | 5.293993  |
| C  | -0.160965 | 0.110075  | 5.818000  |
| C  | -3.938158 | -4.308054 | 0.000000  |
| C  | -5.160507 | -2.221083 | 0.000000  |
| C  | 5.023577  | 5.114053  | 0.000000  |
| C  | 2.948324  | 6.353564  | 0.000000  |
| C  | 1.762546  | -1.732026 | -6.658236 |
| C  | 0.052081  | -0.106374 | -7.182231 |
| C  | 1.762546  | -1.732026 | 6.658236  |
| C  | 0.052081  | -0.106374 | 7.182231  |



|    |           |           |           |
|----|-----------|-----------|-----------|
| C  | -5.144422 | -5.014069 | 0.000000  |
| C  | -6.366241 | -2.927802 | 0.000000  |
| C  | 4.345725  | 6.337150  | 0.000000  |
| C  | 1.013994  | -1.027912 | 7.605629  |
| C  | 1.013994  | -1.027912 | -7.605629 |
| C  | -6.361885 | -4.326092 | 0.000000  |
| H  | 4.836734  | 2.959920  | 0.000000  |
| H  | 1.140680  | 5.166617  | 0.000000  |
| H  | 2.131751  | -2.067088 | -4.553944 |
| H  | -0.912148 | 0.828935  | -5.487571 |
| H  | 2.131751  | -2.067088 | 4.553944  |
| H  | -0.912148 | 0.828935  | 5.487571  |
| H  | -2.989009 | -4.845970 | 0.000000  |
| H  | -5.161989 | -1.130414 | 0.000000  |
| H  | 6.114556  | 5.092138  | 0.000000  |
| H  | 2.412001  | 7.303677  | 0.000000  |
| H  | 2.514265  | -2.453900 | -6.980874 |
| H  | -0.537734 | 0.445434  | -7.915918 |
| H  | 2.514265  | -2.453900 | 6.980874  |
| H  | -0.537734 | 0.445434  | 7.915918  |
| H  | -5.132123 | -6.105199 | 0.000000  |
| H  | -7.311480 | -2.382871 | 0.000000  |
| H  | 4.904716  | 7.273895  | 0.000000  |
| H  | 1.179282  | -1.197377 | 8.670708  |
| H  | 1.179282  | -1.197377 | -8.670708 |
| H  | -7.303142 | -4.877569 | 0.000000  |
| Au | 1.806568  | -1.823624 | 0.000000  |
| O  | -1.351107 | 1.371639  | 0.000000  |
| O  | -2.601106 | 1.101476  | 0.000000  |

**Table S30.** Co Hirshfeld's charge ( $Q_{\text{Co}}$ ,  $e$ ); CoTPP, single atoms and small molecules  $BE$ s and  $\Delta E_{\text{sp}}^{\text{MS}}$  (MS = Cu, Ag, Au); all the energy terms are in eV.

|                                    | CoTPP  | Cu   | Ag   | Au   | CO    | NH <sub>3</sub> | NO    | NO <sub>2</sub> | O <sub>2</sub> |
|------------------------------------|--------|------|------|------|-------|-----------------|-------|-----------------|----------------|
| $Q_{\text{Co}}$                    | 0.21   |      |      |      |       |                 |       |                 |                |
| $\Delta E_{\text{sp}}^{\text{MS}}$ |        | 0.26 | 0.22 | 0.20 |       |                 |       |                 |                |
| $BE$                               | 528.85 |      |      |      | 14.69 | 19.27           | 12.08 | 18.04           | 9.67           |

**Table S31.**  $Q_{\text{Co}}$  ( $e$ ) and  $Q_{\text{MS}}$  ( $e$ ) of the MS–CoTPP clusters; MS–Co bond lengths (BL, Å); MS–CoTPP  $BE$ s, CoTPP preparation energies ( $\Delta E_{\text{prep}}^{\text{CoTPP}}$ ),  $\Delta E_{\text{sp}}^{\text{MS}}$  (see Table S30) and  $BE$ s of the MS–Co bond; all the energy terms are in eV.

|                                         | Cu–CoTPP | Ag–CoTPP | Au–CoTPP |
|-----------------------------------------|----------|----------|----------|
| $Q_{\text{Co}}$                         | 0.04     | 0.04     | 0.08     |
| $Q_{\text{MS}}$                         | 0.19     | 0.24     | 0.05     |
| $BL_{\text{MS-Co}}$                     | 2.27     | 2.47     | 2.46     |
| $\Delta E_{\text{prep}}^{\text{CoTPP}}$ | 0.02     | 0.03     | 0.05     |
| $\Delta E_{\text{sp}}^{\text{MS}}$      | 0.26     | 0.22     | 0.20     |
| $BE$                                    | 530.30   | 530.01   | 530.20   |
| $BE_{\text{MS-Co}}$                     | 1.17     | 0.91     | 1.11     |

**Table S32.**  $Q_{Co}$  ( $e$ ) and  $Q_{0L}$  ( $e$ ) of the LS CoTPP- $^0L$  adducts; Nalewajski-Mrozek ( $^{NM}I_{Co-D}$ )<sup>a</sup> indexes; Co-D BL ( $\text{\AA}$ );<sup>a</sup>  $\Delta E_{prep}^{CoTPP}$ ,  $\Delta E_{prep}^{0L}$  and  $BE$ s of the CoTPP- $^0L$  adducts and of the Co-D bond;<sup>a</sup> all the energy terms are in eV.

|                           | CoTPP-CO | CoTPP-NH <sub>3</sub> |
|---------------------------|----------|-----------------------|
| $Q_{Co}$                  | 0.11     | 0.13                  |
| $Q_{0L}$                  | 0.01     | 0.21                  |
| $^{NM}I_{Co-D}$           | 0.94     | 0.41                  |
| $BL_{Co-D}$               | 1.859    | 2.194                 |
| $\Delta E_{prep}^{CoTPP}$ | 0.28     | 0.10                  |
| $\Delta E_{prep}^{0L}$    | 0.02     | 0.01                  |
| $BE$                      | 544.17   | 548.49                |
| $BE_{Co-D}^b$             | 0.33     | 0.28                  |

<sup>a</sup>D stands for the  $^0L$  donor atom; <sup>b</sup>Co- $^0L$   $BE$ s ( $BE_{Co-D}$ ) include both  $\Delta E_{prep}^{CoTPP}$  and  $\Delta E_{prep}^{0L}$ .

**Table S33.**  $Q_{Co}$  ( $e$ ) and  $Q_{1L}$  ( $e$ ) of the LS CoTPP- $^1L$  adducts;  $^{NM}I_{Co-D}$  indexes; Co-D BL ( $\text{\AA}$ );  $\Delta E_{prep}^{CoTPP}$ ,  $\Delta E_{prep}^{1L}$  and  $BE$ s of the CoTPP- $^1L$  adducts and of the Co-D bond; all the energy terms are in eV.

|                           | CoTPP-NO <sup>b</sup> | CoTPP-NO <sub>2</sub> <sup>c</sup> |
|---------------------------|-----------------------|------------------------------------|
| $Q_{Co}$                  | 0.13                  | 0.14                               |
| $Q_{1L}$                  | -0.02                 | -0.16                              |
| $^{NM}I_{Co-D}$           | 1.21                  | 0.69                               |
| $BL_{Co-D}$               | 1.805                 | 1.878                              |
| $\Delta E_{prep}^{CoTPP}$ | 0.21                  | 0.21                               |
| $\Delta E_{prep}^{1L}$    | 0.02                  | 0.11                               |
| $BE$                      | 542.48                | 548.22                             |
| $BE_{Co-D}^d$             | 1.32                  | 1.03                               |

<sup>a</sup>D stands for the  $^1L$  donor atom; <sup>b</sup>The Co -  $\tilde{N}$  - O bond angle (BA) is 122.5°; <sup>c</sup>The O -  $\tilde{N}$  - O BA is 125.3°; <sup>d</sup>Co- $^1L$   $BE$ s ( $BE_{Co-N}$ ) include both  $\Delta E_{prep}^{CoTPP}$  and  $\Delta E_{prep}^{1L}$ .

**Table S34.**  $Q_{Co}$  ( $e$ ) and  $Q_{2L}$  ( $e$ ) of the LS CoTPP- $^2L$  adducts;  $^{NM}I_{Co-O}$  indexes; Co-O BL ( $\text{\AA}$ );  $\Delta E_{prep}^{CoTPP}$ ,  $\Delta E_{prep}^{2L}$ ,  $BE$ s of the CoTPP- $^2L$  adducts and of the Co- $^2L$  bond; all the energy terms are in eV.

|                           | CoTPP-O <sub>2</sub> <sup>a</sup> |
|---------------------------|-----------------------------------|
| $Q_{Co}$                  | 0.16                              |
| $Q_{2L}$                  | -0.11                             |
| $^{NM}I_{Co-O}$           | 0.85                              |
| $BL_{Co-O}$               | 1.858                             |
| $\Delta E_{prep}^{CoTPP}$ | 0.21                              |
| $\Delta E_{prep}^{2L}$    | 0.08                              |
| $BE$                      | 539.07                            |
| $BE_{Co-O}^b$             | 0.26                              |

<sup>a</sup>The Co -  $\tilde{O}$  - O BA is 119.7°; <sup>b</sup>Co- $^2L$   $BE$  ( $BE_{Co-O}$ ) includes both  $\Delta E_{prep}^{CoTPP}$  and  $\Delta E_{prep}^{2L}$ .

**Table S35.** Co, MS and L formal oxidation states in the free CoTPP complex and in the MS-CoTPP, CoTPP-L, and MS-CoTPP-L clusters. .

|          | -                                 | CO                                   | NH <sub>3</sub>                                    | NO                                                  | NO <sub>2</sub>                                                   | O <sub>2</sub>                                                    |
|----------|-----------------------------------|--------------------------------------|----------------------------------------------------|-----------------------------------------------------|-------------------------------------------------------------------|-------------------------------------------------------------------|
| CoTPP    | Co <sup>II</sup>                  | CO+Co <sup>II</sup>                  | NH <sub>3</sub> +Co <sup>II</sup>                  | NO <sup>(+)</sup> +Co <sup>I</sup>                  | NO <sub>2</sub> <sup>(-)</sup> +Co <sup>III</sup>                 | O <sub>2</sub> <sup>(-)</sup> +Co <sup>III</sup>                  |
| Cu-CoTPP | Co <sup>I</sup> +Cu <sup>I</sup>  | CO+Co <sup>II</sup> +Cu <sup>0</sup> | NH <sub>3</sub> +Co <sup>II</sup> +Cu <sup>0</sup> | NO <sup>(+)</sup> +Co <sup>I</sup> +Cu <sup>0</sup> | NO <sub>2</sub> <sup>(-)</sup> +Co <sup>II</sup> +Cu <sup>0</sup> | O <sub>2</sub> <sup>(-)</sup> +Co <sup>III</sup> +Cu <sup>0</sup> |
| Ag-CoTPP | Co <sup>I</sup> +Ag <sup>I</sup>  | CO+Co <sup>II</sup> +Ag <sup>0</sup> | NH <sub>3</sub> +Co <sup>II</sup> +Ag <sup>0</sup> | NO <sup>(+)</sup> +Co <sup>I</sup> +Ag <sup>0</sup> | NO <sub>2</sub> <sup>(-)</sup> +Co <sup>II</sup> +Cu <sup>0</sup> | O <sub>2</sub> <sup>(-)</sup> +Co <sup>III</sup> +Ag <sup>0</sup> |
| Au-CoTPP | Co <sup>II</sup> +Au <sup>0</sup> | CO+Co <sup>II</sup> +Au <sup>0</sup> | NH <sub>3</sub> +Co <sup>II</sup> +Au <sup>0</sup> | NO <sup>(+)</sup> +Co <sup>I</sup> +Au <sup>0</sup> | NO <sub>2</sub> <sup>(-)</sup> +Co <sup>II</sup> +Au <sup>0</sup> | O <sub>2</sub> <sup>(-)</sup> +Co <sup>III</sup> +Au <sup>0</sup> |

**Table S36.**  $Q_{\text{Co}}(e)$ ,  $Q_{\text{Cu}}(e)$  and  $Q_{\text{L}}(e)$  of the Cu–CoTPP–L clusters;  $^{\text{NM}}I_{\text{Cu–Co}}$  and  $^{\text{NM}}I_{\text{Co–D}}$  indexes;<sup>a</sup> Co–D BLs (Å);<sup>a</sup>  $\Delta E_{\text{prep}}^{\text{CoTPP–L}}$ ,  $\Delta E_{\text{prep}}^{\text{Cu–CoTPP}}$ ,  $\Delta E_{\text{prep}}^{\text{L}}$ , BEs of the Cu–CoTPP–L clusters and of the Co–L and Cu–Co bonds; all the energy terms are in eV.

|                                            | Cu–CoTPP–CO | Cu–CoTPP–NH <sub>3</sub> | Cu–CoTPP–NO | Cu–CoTPP–NO <sub>2</sub> | Cu–CoTPP–O <sub>2</sub> |
|--------------------------------------------|-------------|--------------------------|-------------|--------------------------|-------------------------|
| $Q_{\text{Co}}$                            | 0.02        | 0.03                     | 0.04        | 0.03                     | 0.03                    |
| $Q_{\text{Cu}}$                            | 0.09        | 0.09                     | 0.07        | 0.17                     | 0.18                    |
| $Q_{\text{L}}$                             | 0.04        | 0.21                     | –0.004      | –0.21                    | –0.10                   |
| $^{\text{NM}}I_{\text{Cu–Co}}$             | 0.84        | 1.00                     | 0.28        | 0.35                     | 0.55                    |
| $^{\text{NM}}I_{\text{Co–D}}$              | 0.20        | 0.24                     | 0.97        | 0.50                     | 0.48                    |
| $BL_{\text{Cu–Co}}$                        | 2.343       | 2.305                    | 2.442       | 2.356                    | 2.318                   |
| $BL_{\text{Co–D}}$                         | 1.883       | 2.198                    | 1.860       | 1.971                    | 2.017                   |
| $\Delta E_{\text{prep}}^{\text{CoTPP–L}}$  | 0.062       | 0.038                    | 0.060       | 0.031                    | 0.079                   |
| $\Delta E_{\text{prep}}^{\text{L}}$        | 0.011       | 0.004                    | 0.015       | 0.145                    | 0.058                   |
| $\Delta E_{\text{prep}}^{\text{Cu–CoTPP}}$ | 0.240       | 0.060                    | 0.293       | 0.218                    | 0.109                   |
| $BE_{\text{Cu–Co}}$                        | 0.79        | 1.03                     | 0.41        | 0.68                     | 0.77                    |
| $BE_{\text{Co–D}}$                         | 0.04        | 0.20                     | 0.52        | 0.50                     | 0.05                    |
| $BE$                                       | 545.28      | 549.81                   | 543.21      | 549.20                   | 540.19                  |

<sup>a</sup>D stands for the L donor atom.

**Table S37.**  $Q_{\text{Co}}(e)$ ,  $Q_{\text{Ag}}(e)$  and  $Q_{\text{L}}(e)$  of Ag–CoTPP–L clusters;  $^{\text{NM}}I_{\text{Ag–Co}}$  and  $^{\text{NM}}I_{\text{Co–D}}$  indexes; Co–D BLs (Å);  $\Delta E_{\text{prep}}^{\text{CoTPP–L}}$ ,  $\Delta E_{\text{prep}}^{\text{Ag–CoTPP}}$ ,  $\Delta E_{\text{prep}}^{\text{L}}$ , BEs of the Ag–CoTPP–L clusters and of the Co–L and Ag–Co bonds; all the energy terms are in eV.

|                                            | Ag–CoTPP–CO | Ag–CoTPP–NH <sub>3</sub> | Ag–CoTPP–NO | Ag–CoTPP–NO <sub>2</sub> | Ag–CoTPP–O <sub>2</sub> |
|--------------------------------------------|-------------|--------------------------|-------------|--------------------------|-------------------------|
| $Q_{\text{Co}}$                            | 0.03        | 0.03                     | 0.05        | 0.04                     | 0.04                    |
| $Q_{\text{Ag}}$                            | 0.11        | 0.12                     | 0.08        | 0.18                     | 0.20                    |
| $Q_{\text{L}}$                             | 0.04        | 0.21                     | 0.004       | –0.20                    | –0.11                   |
| $^{\text{NM}}I_{\text{Ag–Co}}$             | 0.81        | 0.97                     | 0.20        | 0.29                     | 0.47                    |
| $^{\text{NM}}I_{\text{Co–D}}$              | 0.71        | 0.24                     | 1.04        | 0.54                     | 0.54                    |
| $BL_{\text{Ag–Co}}$                        | 2.569       | 2.518                    | 2.710       | 2.602                    | 2.547                   |
| $BL_{\text{Co–D}}$                         | 1.877       | 2.208                    | 1.844       | 1.950                    | 1.988                   |
| $\Delta E_{\text{prep}}^{\text{CoTPP–L}}$  | 0.034       | 0.012                    | 0.026       | 0.038                    | 0.059                   |
| $\Delta E_{\text{prep}}^{\text{L}}$        | 0.011       | 0.005                    | 0.014       | 0.141                    | 0.062                   |
| $\Delta E_{\text{prep}}^{\text{Ag–CoTPP}}$ | 0.255       | 0.071                    | 0.345       | 0.273                    | 0.132                   |
| $BE_{\text{Ag–Co}}$                        | 0.55        | 0.74                     | 0.26        | 0.40                     | 0.54                    |
| $BE_{\text{Co–D}}$                         | 0.01        | 0.10                     | 0.54        | 0.43                     | 0.02                    |
| $BE$                                       | 544.96      | 549.46                   | 542.99      | 548.88                   | 539.89                  |

**Table S38.**  $Q_{\text{Co}}(e)$ ,  $Q_{\text{Au}}(e)$  and  $Q_{\text{L}}(e)$  of Au–CoTPP–L clusters;  $^{\text{NM}}I_{\text{Au–Co}}$  and  $^{\text{NM}}I_{\text{Ag–D}}$  indexes; Co–D BLs (Å);  $\Delta E_{\text{prep}}^{\text{CoTPP–L}}$ ,  $\Delta E_{\text{prep}}^{\text{Au–CoTPP}}$ ,  $\Delta E_{\text{prep}}^{\text{L}}$ , BEs of the Au–CoTPP–L clusters and of the Co–L and Au–Co bonds; all the energy terms are in eV.

|                                            | Au–CoTPP–CO | Au–CoTPP–NH <sub>3</sub> | Au–CoTPP–NO | Au–CoTPP–NO <sub>2</sub> | Au–CoTPP–O <sub>2</sub> |
|--------------------------------------------|-------------|--------------------------|-------------|--------------------------|-------------------------|
| $Q_{\text{Co}}$                            | 0.06        | 0.06                     | 0.06        | 0.05                     | 0.06                    |
| $Q_{\text{Au}}$                            | –0.07       | –0.07                    | –0.02       | 0.03                     | 0.04                    |
| $Q_{\text{L}}$                             | 0.07        | 0.25                     | 0.02        | –0.19                    | –0.09                   |
| $^{\text{NM}}I_{\text{Au–Co}}$             | 0.85        | 1.06                     | 0.39        | 0.37                     | 0.60                    |
| $^{\text{NM}}I_{\text{Co–D}}$              | 0.78        | 0.34                     | 0.97        | 0.55                     | 0.53                    |
| $BL_{\text{Au–Co}}$                        | 2.522       | 2.498                    | 2.614       | 2.558                    | 2.515                   |
| $BL_{\text{Co–D}}$                         | 1.822       | 2.084                    | 1.843       | 1.951                    | 1.978                   |
| $\Delta E_{\text{prep}}^{\text{CoTPP–L}}$  | 0.140       | 0.092                    | 0.058       | 0.038                    | 0.089                   |
| $\Delta E_{\text{prep}}^{\text{L}}$        | 0.009       | 0.001                    | 0.010       | 0.143                    | 0.059                   |
| $\Delta E_{\text{prep}}^{\text{CoTPP–Au}}$ | 0.267       | 0.074                    | 0.346       | 0.301                    | 0.162                   |
| $BE_{\text{Au–Co}}$                        | 0.92        | 1.14                     | 0.49        | 0.62                     | 0.72                    |
| $BE_{\text{Co–D}}$                         | 0.25        | 0.38                     | 0.59        | 0.40                     | –0.01                   |
| $BE$                                       | 545.42      | 549.92                   | 543.23      | 549.08                   | 540.08                  |

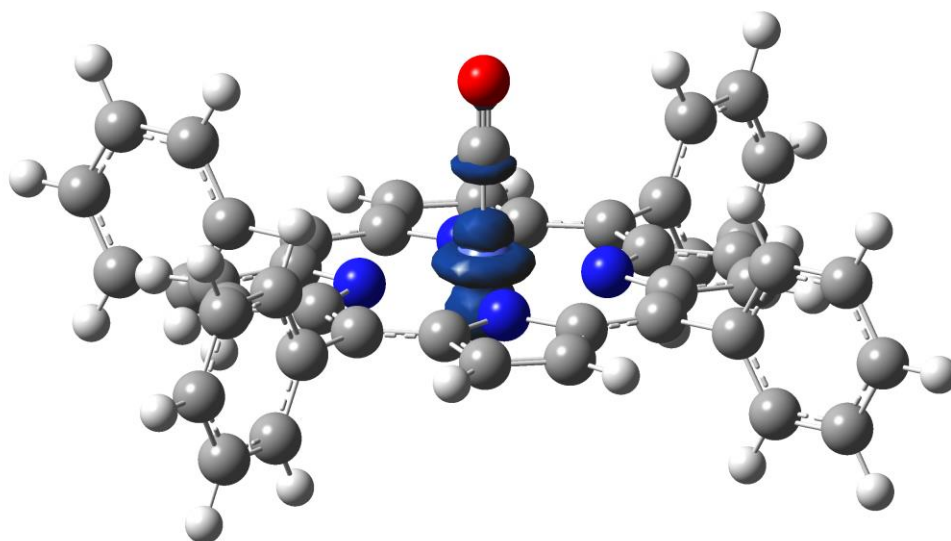

**Figure S1.** 3D plot of the CoTPP-CO spin density. The displayed isosurface corresponds to  $+0.005 e \times \text{\AA}^{-3}$  value.

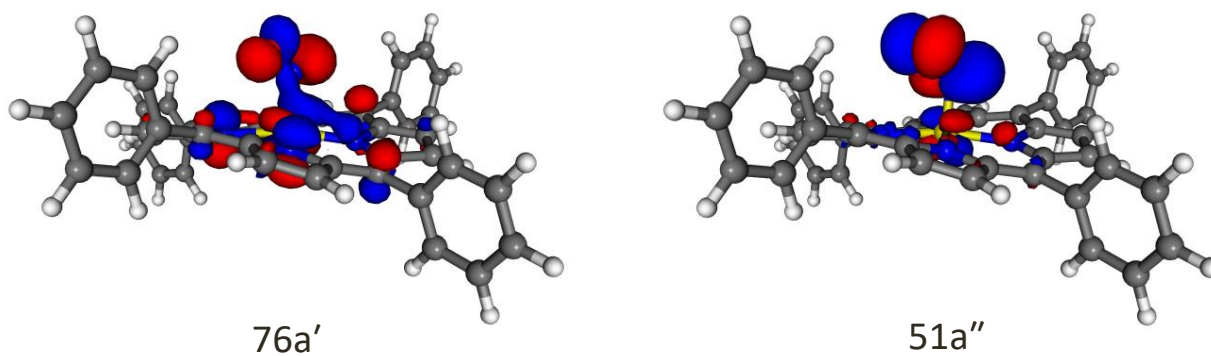

76a'

51a''

**Figure S2.** 3D plot of the CoTPP-NO 76a' HOMO (left panel) and 51a'' LUMO (right panel). The displayed isosurfaces correspond to  $\pm 0.03 e^{1/2} \times \text{\AA}^{-3/2}$  values.

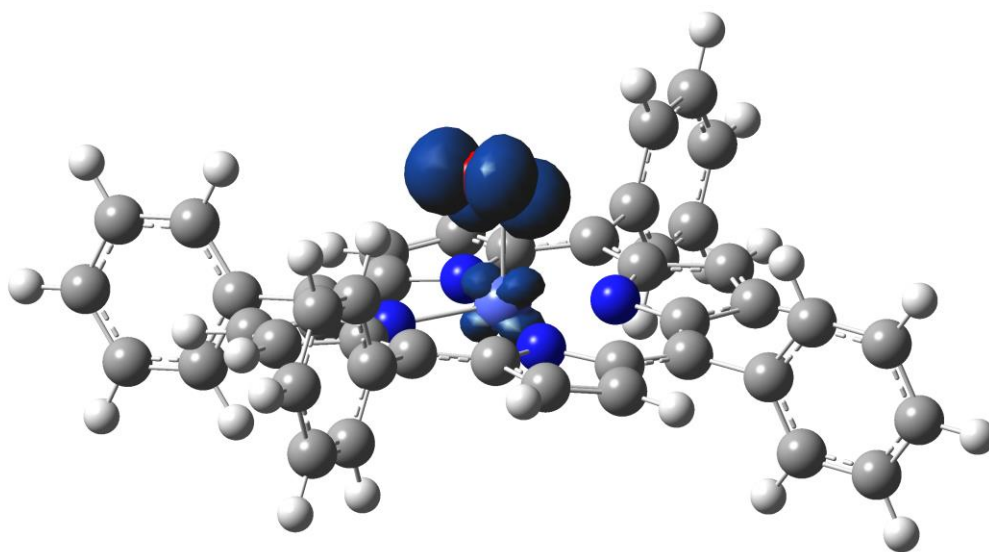

**Figure S3.** 3D plot of the CoTPP-( $\eta^1$ -O<sub>2</sub>) spin density. The displayed isosurface corresponds to  $+0.005 e \times \text{\AA}^{-3}$  value.
